# Supplementary material for: Rhodium-catalyzed homodimerization–cyclization reaction of two vinyl isocyanides: a general route to 2-(isoquinolin-1-yl)oxazoles
Source: Royal Society of Chemistry journal article supplement (doi:10.1039/c9qo01229j), 2019-11-22
Supplement: c9qo01229j1.pdf [file c9qo01229j1.pdf]

## Supporting Information

### **Rhodium-Catalyzed Homodimerization-Cyclization Reaction of Two Vinyl Isocyanides: A General Route to 2-(Isoquinolin-1-yl)oxazole**

Zhuo Wang, Xiang-He Meng, Pei Liu, Wan-Ying Hu, and Yu-Long Zhao\*

Jilin Province Key Laboratory of Organic Functional Molecular Design & Synthesis, Faculty of  
Chemistry, Northeast Normal University, Changchun 130024, China; e-mail:  
[zhaoyl351@nenu.edu.cn](mailto:zhaoyl351@nenu.edu.cn)

#### Table of contents

|                                                                                                                 |                |
|-----------------------------------------------------------------------------------------------------------------|----------------|
| <b>I. General Information .....</b>                                                                             | <b>S2</b>      |
| <b>II. General Procedure for the Preparation of 2 (2a as Example).....</b>                                      | <b>S3-S13</b>  |
| <b>III. General Procedure for the Preparation of 3 (3a as Example).....</b>                                     | <b>S14-S15</b> |
| <b>IV. General Procedure for the Preparation of 4 (4a as Example).....</b>                                      | <b>S16-S17</b> |
| <b>V. ORTEP Drawing of Compound 2k.....</b>                                                                     | <b>S18</b>     |
| <b>VI. Copies of <sup>1</sup>H NMR, <sup>13</sup>C NMR and <sup>19</sup>F NMR Spectra of Compounds 2-4.....</b> | <b>S19-S41</b> |

## I. General Information :

Unless stated otherwise, all reactions were carried out in glassware under air. All glassware and stirrers were dried in an oven at 85 °C overnight. All reagents were commercially available and were used without further purification. The vinyl isocyanides **1** were prepared according to the previous method reported.<sup>1</sup> Elevated temperatures were maintained by an IKA heating block for 1 dram vials. The chromatographic purification of the products was performed on silica gel 300–400 mesh. NMR-spectra were measured in the given solvent at room temperature on a Bruker Avance (600 MHz, <sup>1</sup>H; 151 MHz, <sup>13</sup>C) instrument. Data for <sup>1</sup>H NMR and <sup>13</sup>C NMR are reported in terms of chemical shift ( $\delta$ , ppm). High-resolution mass spectra (HRMS) were obtained using a Bruker microTOF II focus spectrometer (ESI). The compound **2k** was glued on a glass fiber. Data were collected at 293 K using graphite-monochromated Mo K $\alpha$  radiation ( $\lambda = 0.71073\text{\AA}$ ) and IP technique in the range  $2.19^\circ < \theta < 27.48^\circ$ . Empirical absorption correction was applied. The structures were solved by the direct method and refined by the full-matrix least-squares method on  $F^2$  using the SHELXS 97 crystallographic software package. Anisotropic thermal parameters were used to refine all non-hydrogen atoms. Hydrogen atoms were located from difference Fourier maps.

1. H. Jiang, Y. Cheng, R. Wang, Y. Zhang, S. Yu, *Chem. Commun.* **2014**, 50, 6164-6167.

## II. General Procedure for the Preparation of **2** (**2a** as Example):

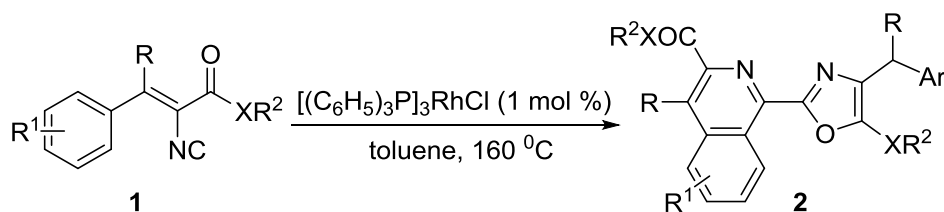

To a solution of ethyl 2-isocyano-3,3-diphenylacrylate **1a** (0.2 mmol, 55.4 mg) in toluene (2.0 mL) was added the  $[(\text{C}_6\text{H}_5)_3\text{P}]_3\text{RhCl}$  (1.8 mg, 0.002 mmol). The reaction mixture was stirred for 12 h at 160 °C in a 10 mL sealed tube. After the reaction was complete, the reaction mixture was poured into saturated aqueous NaCl (5.0 mL) and extracted with  $\text{CH}_2\text{Cl}_2$  (2.0 mL  $\times$  3). The combined organic extracts were dried over anhydrous  $\text{Mg}_2\text{SO}_4$ , filtered and concentrated under reduced pressure to yield the crude product, which was purified by chromatography (ethyl acetate/petroleum ether = 1/5, V/V) to give **2a** (82.1 mg, 74%) as a yellow solid.

### A gram-scale synthesis of compound **2d**:

To a solution of ethyl 2-isocyano-3,3-di-p-tolylacrylate **1d** (4.0 mmol, 1.22 g) in toluene (12.0 mL) was added the  $[(\text{C}_6\text{H}_5)_3\text{P}]_3\text{RhCl}$  (36.0 mg, 0.04 mmol). The reaction mixture was stirred for 12 h at 160 °C in a 35 mL sealed tube. After the reaction was complete, the reaction mixture was poured into saturated aqueous NaCl (100.0 mL) and extracted with  $\text{CH}_2\text{Cl}_2$  (40.0 mL  $\times$  3). The combined organic extracts were dried over anhydrous  $\text{Mg}_2\text{SO}_4$ , filtered and concentrated under reduced pressure to yield the crude product, which was purified by chromatography (ethyl acetate/petroleum ether = 1/5, V/V) to give **2d** (1.49 g, 61%) as a yellow solid.

### Ethyl 1-(4-benzhydryl-5-ethoxyoxazol-2-yl)-4-phenylisoquinoline-3-carboxylate (**2a**):

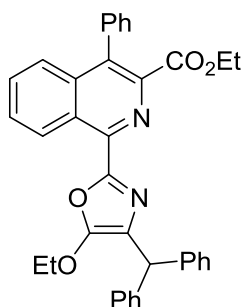

Eluent: ethyl acetate/petroleum ether (1/5). Yellow solid (82.1 mg, 74%), mp. 60–61 °C;  $R_f$  = 0.45 (ethyl acetate/petroleum ether = 3/10);  $^1\text{H NMR}$  (600 MHz,  $\text{CDCl}_3$ )  $\delta$ : 9.58 (d,  $J$  = 8.5 Hz, 1H),

7.72–7.69 (m, 1H), 7.67–7.64 (m, 2H), 7.49 (d,  $J = 7.2$  Hz, 3H), 7.41 (d,  $J = 7.8$  Hz, 4H), 7.36–7.35 (m, 2H), 7.32 (t,  $J = 7.7$  Hz, 4H), 7.23 (t,  $J = 7.3$  Hz, 2H), 5.47 (s, 1H), 4.27 (q,  $J = 7.1$  Hz, 2H), 4.14 (q,  $J = 7.1$  Hz, 2H), 1.30 (t,  $J = 7.1$  Hz, 3H), 0.99 (t,  $J = 7.1$  Hz, 3H);  $^{13}\text{C}$  NMR (151 MHz,  $\text{CDCl}_3$ )  $\delta$ : 166.95, 155.86, 150.09, 144.27, 142.72, 141.63, 136.64, 136.08, 134.13, 130.73, 129.87, 129.41, 129.00, 128.29, 128.22, 128.09, 127.94, 126.55, 126.46, 126.38, 120.34, 70.29, 61.37, 47.22, 15.02, 13.69; HRMS(ESI-TOF):  $[\text{M} + \text{Na}]^+$  calculated for  $\text{C}_{36}\text{H}_{30}\text{N}_2\text{NaO}_4^+$ : 577.2098, found: 577.2104.

**Ethyl 1-(4-(bis(4-chlorophenyl)methyl)-5-ethoxyoxazol-2-yl)-7-chloro-4-(4-chlorophenyl)isoquinoline-3-carboxylate (2b):**

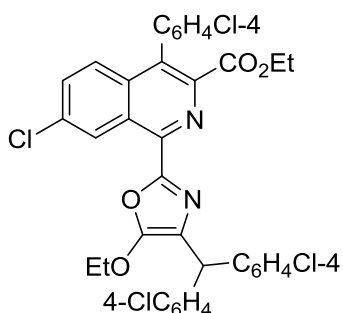

Eluent: ethyl acetate/petroleum ether (1/5). Yellow solid (108.0 mg, 78%), mp. 96–97 °C;  $R_f = 0.45$  (ethyl acetate/petroleum ether = 3/10);  $^1\text{H}$  NMR (600 MHz,  $\text{CDCl}_3$ )  $\delta$ : 9.59 (d,  $J = 1.9$  Hz, 1H), 7.62–7.60 (m, 1H), 7.56 (d,  $J = 9.1$  Hz, 1H), 7.49 (d,  $J = 8.3$  Hz, 2H), 7.34 (s, 1H), 7.32 (d,  $J = 5.3$  Hz, 6H), 7.30 (s, 1H), 7.28 (d,  $J = 8.3$  Hz, 2H), 5.37 (s, 1H), 4.36 (q,  $J = 7.1$  Hz, 2H), 4.19 (q,  $J = 7.1$  Hz, 2H), 1.36 (t,  $J = 7.1$  Hz, 3H), 1.08 (t,  $J = 7.1$  Hz, 3H);  $^{13}\text{C}$  NMR (151 MHz,  $\text{CDCl}_3$ )  $\delta$ : 166.26, 155.78, 149.55, 143.12, 140.70, 136.05, 134.87, 134.61, 133.89, 132.87, 132.62, 131.94, 131.07, 130.13, 128.65, 128.59, 127.96, 127.11, 126.70, 119.12, 70.28, 61.68, 45.60, 15.01, 13.74; HRMS(ESI-TOF):  $[\text{M} + \text{Na}]^+$  calculated for  $\text{C}_{36}\text{H}_{26}\text{Cl}_4\text{N}_2\text{NaO}_4^+$ : 713.0539, found: 713.0532.

**Ethyl 1-(4-(bis(4-fluorophenyl)methyl)-5-ethoxyoxazol-2-yl)-7-fluoro-4-(4-fluorophenyl)isoquinoline-3-carboxylate (2c):**

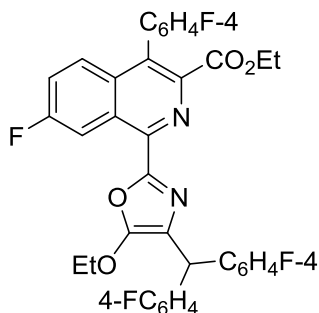

Eluent: ethyl acetate/petroleum ether (1/5). Yellow solid (96.5 mg, 77%), mp. 112–114 °C;  $R_f$  = 0.50 (ethyl acetate/petroleum ether = 3/10);  $^1\text{H}$  NMR (600 MHz,  $\text{CDCl}_3$ )  $\delta$ : 9.31–9.29 (m, 1H), 7.66–7.64 (m, 1H), 7.46–7.43 (m, 1H), 7.36 (d,  $J$  = 1.8 Hz, 1H), 7.35 (d,  $J$  = 3.2 Hz, 2H), 7.34 (t,  $J$  = 2.0 Hz, 1H), 7.32 (d,  $J$  = 3.3 Hz, 1H), 7.31 (d,  $J$  = 2.1 Hz, 1H), 7.23–7.20 (m, 2H), 7.04–7.00 (m, 4H), 5.41 (s, 1H), 4.32 (q,  $J$  = 7.1 Hz, 2H), 4.18 (q,  $J$  = 7.1 Hz, 2H), 1.34 (t,  $J$  = 7.1 Hz, 3H), 1.07 (t,  $J$  = 7.1 Hz, 3H);  $^{13}\text{C}$  NMR (151 MHz,  $\text{CDCl}_3$ )  $\delta$ : 166.49, 162.44 (d,  $J$  = 54.0 Hz), 161.95 (d,  $J$  = 57.8 Hz), 161.57 (d,  $J$  = 245.2 Hz), 160.81, 155.65, 149.82, 143.35 (d,  $J$  = 5.6 Hz), 138.16, 138.13 (d,  $J$  = 3.2 Hz), 133.80, 133.05, 131.50 (d,  $J$  = 8.1 Hz), 131.44, 130.27 (d,  $J$  = 7.9 Hz), 130.22, 129.33 (d,  $J$  = 8.8 Hz), 129.27, 127.39 (d,  $J$  = 10.3 Hz), 121.44 (d,  $J$  = 25.4 Hz), 121.27, 119.79 (d,  $J$  = 24.6 Hz), 115.52 (d,  $J$  = 21.7 Hz), 115.38, 115.23, 115.08, 112.00, 111.84, 70.24, 61.54, 45.52, 14.96, 13.74;  $^{19}\text{F}$  NMR (565 MHz,  $\text{CDCl}_3$ )  $\delta$ : -106.84–-106.88 (m, 1F), -112.23–-114.49 (m, 1F), -115.46–-119.21 (m, 2F); HRMS(ESI-TOF):  $[\text{M} + \text{Na}]^+$  calculated for  $\text{C}_{36}\text{H}_{26}\text{F}_4\text{N}_2\text{NaO}_4^+$ : 649.1721, found: 649.1729.

**Ethyl 1-(4-(di-*p*-tolylmethyl)-5-ethoxyoxazol-2-yl)-7-methyl-4-(*p*-tolyl)isoquinoline-3-carboxylate (2d):**

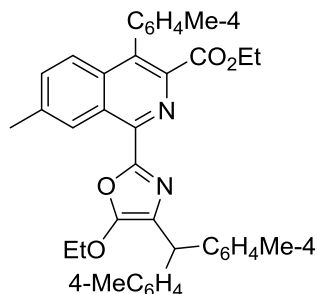

Eluent: ethyl acetate/petroleum ether (1/5). Yellow solid (83.1 mg, 68%), mp. 84–85 °C;  $R_f$  = 0.45 (ethyl acetate/petroleum ether = 3/10);  $^1\text{H}$  NMR (600 MHz,  $\text{CDCl}_3$ )  $\delta$ : 9.31 (s, 1H), 7.58 (d,  $J$  = 8.7 Hz, 1H), 7.47–7.45 (m, 1H), 7.32 (d,  $J$  = 8.0 Hz, 4H), 7.29 (d,  $J$  = 7.8 Hz, 2H), 7.23 (t,  $J$  = 6.4

Hz, 2H), 7.12 (d,  $J = 8.0$  Hz, 4H), 5.37 (s, 1H), 4.30 (q,  $J = 7.1$  Hz, 2H), 4.16 (q,  $J = 7.1$  Hz, 2H), 2.53 (s, 3H), 2.45 (s, 3H), 2.32 (s, 6H), 1.34 (t,  $J = 7.1$  Hz, 3H), 1.04 (t,  $J = 7.1$  Hz, 3H);  $^{13}\text{C}$  NMR (151 MHz,  $\text{CDCl}_3$ )  $\delta$ : 167.02, 155.42, 149.99, 140.72, 140.11, 139.53, 137.65, 135.77, 134.99, 134.35, 133.16, 132.7, 129.62, 128.89, 128.81, 128.75, 126.95, 126.62, 126.38, 120.36, 70.27, 61.25, 46.06, 22.10, 21.31, 20.99, 15.03, 13.68; HRMS(ESI-TOF):  $[\text{M} + \text{Na}]^+$  calculated for  $\text{C}_{40}\text{H}_{38}\text{N}_2\text{NaO}_4^+$ : 633.2724, found: 633.2731.

**Ethyl 1-(4-(bis(4-methoxyphenyl)methyl)-5-ethoxyoxazol-2-yl)-7-methoxy-4-(4-methoxyphenyl)isoquinoline-3-carboxylate (2e):**

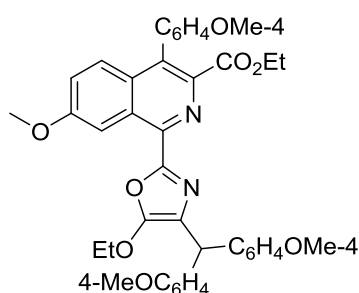

Eluent: ethyl acetate/petroleum ether (1/5). Yellow solid (85.0 mg, 63%), mp. 107–108 °C;  $R_f = 0.45$  (ethyl acetate/petroleum ether = 3/10);  $^1\text{H}$  NMR (600 MHz,  $\text{CDCl}_3$ )  $\delta$ : 9.02 (d,  $J = 2.3$  Hz, 1H), 7.59 (d,  $J = 9.3$  Hz, 1H), 7.29 (d,  $J = 8.6$  Hz, 4H), 7.26–7.24 (m, 3H), 7.02 (d,  $J = 8.4$  Hz, 2H), 6.82 (d,  $J = 8.6$  Hz, 4H), 5.36 (s, 1H), 4.34 (q,  $J = 7.0$  Hz, 2H), 4.17 (q,  $J = 7.2$  Hz, 2H), 3.88 (s, 3H), 3.78 (s, 9H), 1.36 (t,  $J = 7.1$  Hz, 3H), 1.07 (t,  $J = 7.2$  Hz, 3H);  $^{13}\text{C}$  NMR (151 MHz,  $\text{CDCl}_3$ )  $\delta$ : 167.11, 160.13, 159.45, 158.05, 135.38, 134.19, 132.36, 130.91, 129.76, 128.35, 128.14, 128.02, 123.70, 120.54, 113.70, 113.63, 113.53, 105.34, 70.32, 61.20, 55.46, 55.31, 55.19, 45.00, 15.08, 13.81; HRMS(ESI-TOF):  $[\text{M} + \text{Na}]^+$  calculated for  $\text{C}_{40}\text{H}_{38}\text{N}_2\text{NaO}_8^+$ : 697.2520, found: 697.2545.

**Ethyl 4-(4-chlorophenyl)-1-(4-((4-chlorophenyl)(phenyl)methyl)-5-ethoxyoxazol-2-yl)isoquinoline-3-carboxylate (2f):**

**Ethyl 7-chloro-1-(4-((3-chlorophenyl)(phenyl)methyl)-5-ethoxyoxazol-2-yl)-4-phenylisoquinoline-3-carboxylate (2f')**

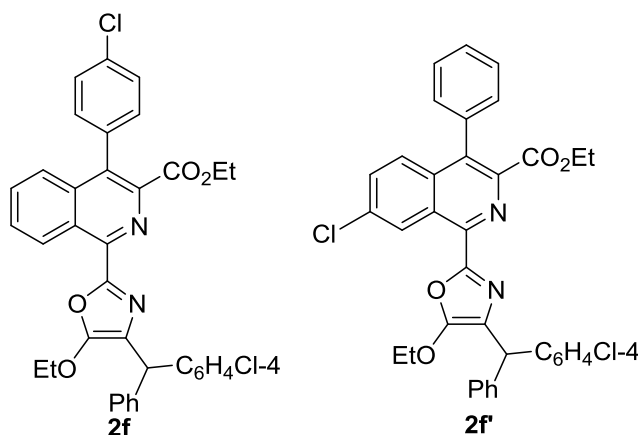

Eluent: ethyl acetate/petroleum ether (1/5). According to the  $^1\text{H}$  NMR, the ratio of isomer (**2f**/**2f'**) was approximately 2:1; Red solid (89.8 mg, 72%);  $R_f = 0.50$  (ethyl acetate/petroleum ether = 3/10);  $^1\text{H}$  NMR (600 MHz,  $\text{CDCl}_3$ )  $\delta$ : 9.64 (s, 1H $\times$ 0.34), 9.55 (d,  $J = 8.5$  Hz, 1H $\times$ 0.66), 7.70 (t,  $J = 7.6$  Hz, 1H), 7.64 (t,  $J = 7.5$  Hz, 1H $\times$ 0.66), 7.61–7.59 (m, 1H), 7.57–7.55 (m, 1H $\times$ 0.34), 7.49–7.47 (m, 2H), 7.42 (d,  $J = 7.6$  Hz, 1H), 7.39 (s, 1H), 7.38 (s, 1H), 7.35 (s, 1H), 7.34 (s, 2H), 7.32–7.29 (m, 4H), 7.25–7.22 (m, 1H), 5.44 (s, 1H $\times$ 0.66), 5.41 (s, 1H $\times$ 0.34), 4.33 (q,  $J = 7.2$  Hz, 2H $\times$ 0.34), 4.29 (q,  $J = 7.1$  Hz, 2H $\times$ 0.66), 4.18 (q,  $J = 7.1$  Hz, 2H $\times$ 0.66), 4.13 (q,  $J = 7.1$  Hz, 2H $\times$ 0.34), 1.34 (t,  $J = 7.1$  Hz, 3H $\times$ 0.34), 1.31 (t,  $J = 7.0$  Hz, 3H $\times$ 0.66), 1.08 (t,  $J = 7.1$  Hz, 3H $\times$ 0.66), 0.98 (t,  $J = 7.1$  Hz, 3H $\times$ 0.34);  $^{13}\text{C}$  NMR (151 MHz,  $\text{CDCl}_3$ )  $\delta$ : 166.50, 166.44, 155.74, 155.66, 149.90, 149.56, 144.24, 142.91, 142.13, 142.08, 141.87, 141.28, 141.16, 141.10, 136.38, 135.66, 135.34, 134.87, 134.42, 134.18, 133.78, 132.96, 132.26, 132.20, 131.59, 131.10, 130.86, 130.23, 130.18, 129.66, 129.53, 128.73, 128.68, 128.40, 128.39, 128.37, 128.30, 128.28, 128.23, 128.14, 127.78, 126.99, 126.65, 126.62, 126.58, 126.17, 70.21, 70.13, 61.43, 61.36, 46.43, 46.16, 14.94, 14.91, 13.68, 13.56.

**Ethyl 1-(5-ethoxy-4-(phenyl(p-tolyl)methyl)oxazol-2-yl)-7-methyl-4-phenylisoquinoline-3-carboxylate (2g):**

**Ethyl 1-(5-ethoxy-4-(phenyl(p-tolyl)methyl)oxazol-2-yl)-4-(p-tolyl)isoquinoline-3-carboxylate (2g'):**

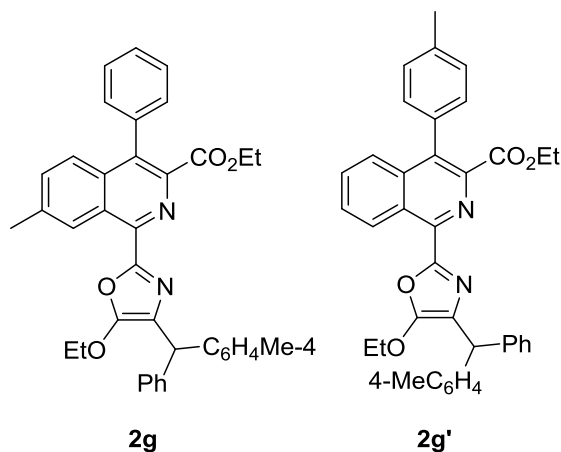

Eluent: ethyl acetate/petroleum ether (1/5). According to the  $^1\text{H}$  NMR, the ratio of isomer (**2g/2g'**) was approximately 4:1; Red solid (76.9 mg, 66%);  $R_f = 0.45$  (ethyl acetate/petroleum ether = 3/10);  $^1\text{H}$  NMR (600 MHz,  $\text{CDCl}_3$ )  $\delta$ : 9.58 (d,  $J = 8.4$  Hz, 1H $\times$ 0.8), 9.46 (d,  $J = 8.8$  Hz, 1H $\times$ 0.2), 7.69 (d,  $J = 8.0$  Hz, 1H), 7.65–7.63 (m, 1H), 7.53–7.47 (m, 1H), 7.41 (d,  $J = 7.8$  Hz, 2H), 7.39–7.35 (m, 1H), 7.31 (t,  $J = 7.6$  Hz, 2H), 7.27 (s, 1H), 7.24 (d,  $J = 5.5$  Hz, 1H), 7.22–7.21 (m, 3H), 7.17–7.14 (m, 2H), 7.05–7.04 (m, 1H), 5.42 (s, 1H $\times$ 0.8), 5.41 (s, 1H $\times$ 0.2), 4.27 (q,  $J = 7.0$  Hz, 2H), 4.18–4.11 (m, 2H), 2.43 (s, 3H $\times$ 0.2), 2.42 (3H $\times$ 0.8), 2.34 (s, 3H), 1.30 (t,  $J = 7.1$  Hz, 3H), 1.02–0.97 (m, 3H);  $^{13}\text{C}$  NMR (151 MHz,  $\text{CDCl}_3$ )  $\delta$ : 166.96, 155.75, 149.99, 142.79, 142.56, 141.60, 137.76, 136.60, 135.87, 134.19, 130.60, 130.41, 129.84, 129.70, 129.25, 128.91, 128.75, 128.20, 128.15, 128.12, 128.05, 127.89, 127.17, 126.96, 126.57, 126.33, 126.02, 120.33, 70.22, 61.26, 47.06, 21.51, 21.41, 14.97, 13.64.

**Ethyl 1-(5-ethoxy-4-(1-phenylethyl)oxazol-2-yl)-4-methylisoquinoline-3-carboxylate (**2h**):**

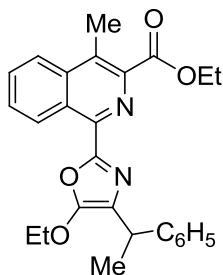

Eluent: ethyl acetate/petroleum ether (1/7). Yellow liquid (64.6 mg, 75%);  $R_f = 0.50$  (ethyl acetate/petroleum ether = 1/4);  $^1\text{H}$  NMR (600 MHz,  $\text{CDCl}_3$ )  $\delta$ : 9.58 (d,  $J = 8.4$  Hz, 1H), 8.15 (d,  $J = 8.3$  Hz, 1H), 7.81–7.75 (m, 2H), 7.42 (d,  $J = 7.6$  Hz, 2H), 7.30 (t,  $J = 7.5$  Hz, 2H), 7.20 (t,  $J = 7.3$  Hz, 1H), 4.52 (q,  $J = 7.1$  Hz, 2H), 4.32–4.24 (m, 2H), 4.16 (q,  $J = 7.2$  Hz, 1H), 2.87 (s, 3H), 1.72 (d,  $J = 7.2$  Hz, 3H), 1.48 (t,  $J = 7.1$  Hz, 3H), 1.35 (t,  $J = 7.0$  Hz, 3H);  $^{13}\text{C}$  NMR (151 MHz,



CDCl<sub>3</sub>)  $\delta$ : 167.25, 154.58, 145.22, 141.30, 136.86, 130.58, 129.88, 129.22, 128.28, 127.34, 126.19, 126.15, 124.21, 122.21, 70.16, 61.71, 36.08, 20.91, 15.05, 14.65, 14.28; HRMS(ESI-TOF): [M + Na]<sup>+</sup> calculated for C<sub>26</sub>H<sub>26</sub>N<sub>2</sub>NaO<sub>4</sub><sup>+</sup>: 453.1785, found: 453.1694.

**Ethyl 1-(5-ethoxy-4-(1-(p-tolyl)ethyl)oxazol-2-yl)-4,7-dimethylisoquinoline-3-carboxylate (2i):**

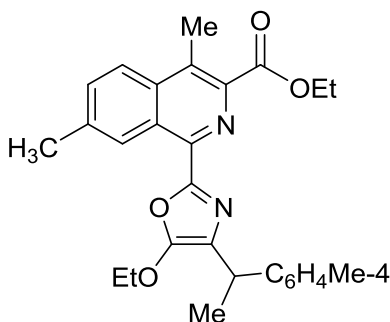

Eluent: ethyl acetate/petroleum ether (1/7). Yellow liquid (58.7 mg, 64%); R<sub>f</sub> = 0.50 (ethyl acetate/petroleum ether = 1/4); <sup>1</sup>H NMR (600 MHz, CDCl<sub>3</sub>)  $\delta$ : 9.29 (s, 1H), 8.00 (d, *J* = 8.7 Hz, 1H), 7.57 (d, *J* = 8.7 Hz, 1H), 7.36 (d, *J* = 7.9 Hz, 2H), 7.13 (d, *J* = 7.8 Hz, 2H), 4.51 (q, *J* = 7.1 Hz, 2H), 4.33–4.25 (m, 2H), 4.13 (q, *J* = 7.2 Hz, 1H), 2.84 (s, 3H), 2.57 (s, 3H), 2.32 (s, 3H), 1.70 (d, *J* = 7.3 Hz, 3H), 1.47 (t, *J* = 7.1 Hz, 3H), 1.37 (t, *J* = 7.1 Hz, 3H); <sup>13</sup>C NMR (151 MHz, CDCl<sub>3</sub>)  $\delta$ : 167.29, 142.46, 142.29, 140.41, 139.48, 135.63, 135.14, 132.70, 130.19, 128.96, 127.30, 127.29, 126.50, 124.12, 122.34, 70.23, 61.65, 35.63, 22.17, 21.10, 20.98, 15.08, 14.65, 14.30; HRMS(ESI-TOF): [M + H]<sup>+</sup> calculated for C<sub>28</sub>H<sub>31</sub>N<sub>2</sub>O<sub>4</sub><sup>+</sup>: 459.2278, found: 459.2289.

**Ethyl 7-chloro-1-(4-(4-chlorobenzyl)-5-ethoxyoxazol-2-yl)isoquinoline-3-carboxylate (2j):**

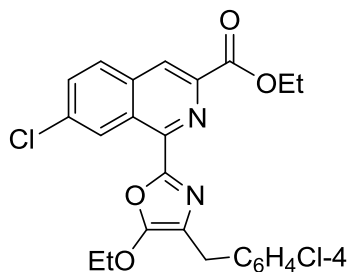

Eluent: ethyl acetate/petroleum ether (1/7). Yellow solid (68.8 mg, 73%), mp. 86–87 °C; R<sub>f</sub> = 0.50 (ethyl acetate/petroleum ether = 1/4); <sup>1</sup>H NMR (600 MHz, CDCl<sub>3</sub>)  $\delta$ : 9.35–9.33 (m, 1H), 8.55 (s, 1H), 8.02–7.99 (m, 1H), 7.60–7.56 (m, 1H), 7.32–7.28 (m, 2H), 7.00 (t, *J* = 8.7 Hz, 2H), 4.53 (q, *J* = 7.1 Hz, 2H), 4.39 (q, *J* = 7.1 Hz, 2H), 3.90 (s, 2H), 1.50 (t, *J* = 7.1 Hz, 3H), 1.42 (t, *J* = 7.1 Hz,

3H);  $^{13}\text{C}$  NMR (151 MHz,  $\text{CDCl}_3$ )  $\delta$ : 165.09, 145.26, 141.82, 136.67, 134.89, 132.74, 131.06, 130.40, 130.28, 129.36, 128.22, 127.76, 127.12, 126.75, 120.62, 116.15, 70.17, 62.17, 28.91, 15.06, 14.35; HRMS(ESI-TOF):  $[\text{M} + \text{Na}]^+$  calculated for  $\text{C}_{24}\text{H}_{20}\text{Cl}_2\text{N}_2\text{NaO}_4^+$ : 493.0692, found: 493.0681.

**Ethyl 1-(5-ethoxy-4-(4-fluorobenzyl)oxazol-2-yl)-7-fluoroisoquinoline-3-carboxylate (2k):**

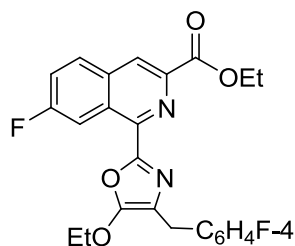

Eluent: ethyl acetate/petroleum ether (1/7). Yellow solid (67.5 mg, 77%), mp. 127–129 °C;  $R_f$  = 0.50 (ethyl acetate/petroleum ether = 1/4);  $^1\text{H}$  NMR (600 MHz,  $\text{CDCl}_3$ )  $\delta$ : 9.35–9.32 (m, 1H), 8.54 (s, 1H), 8.01–7.99 (m, 1H), 7.59–7.56 (m, 1H), 7.32–7.30 (m, 2H), 7.01–6.98 (m, 2H), 4.53 (q,  $J$  = 7.1 Hz, 2H), 4.39 (q,  $J$  = 7.1 Hz, 2H), 3.90 (s, 2H), 1.50 (t,  $J$  = 7.1 Hz, 3H), 1.42 (t,  $J$  = 7.1 Hz, 3H);  $^{13}\text{C}$  NMR (151 MHz,  $\text{CDCl}_3$ )  $\delta$ : 165.20, 162.24 (d,  $J$  = 237.7 Hz), 161.48 (d,  $J$  = 229.2 Hz), 155.73, 149.73, 144.19 (d,  $J$  = 5.8 Hz), 140.49, 134.89 (d,  $J$  = 3.2 Hz), 134.87, 133.88, 131.06 (d,  $J$  = 9.1 Hz), 131.00, 129.96 (d,  $J$  = 7.8 Hz), 129.90, 128.21 (d,  $J$  = 10.3 Hz), 124.15, 121.74 (d,  $J$  = 25.9 Hz), 121.56, 117.72, 115.23 (d,  $J$  = 21.3 Hz), 115.09, 112.38 (d,  $J$  = 24.5 Hz), 112.22, 70.18, 62.01, 30.34, 15.06, 14.32;  $^{19}\text{F}$  NMR (565 MHz,  $\text{CDCl}_3$ )  $\delta$ : -96.00–-112.05 (m, 1F), -109.37–-121.37 (m, 1F); HRMS(ESI-TOF):  $[\text{M} + \text{Na}]^+$  calculated for  $\text{C}_{24}\text{H}_{20}\text{F}_2\text{N}_2\text{NaO}_4^+$ : 461.1283, found: 461.1299.

**Ethyl 1-(5-ethoxy-4-(2-fluorobenzyl)oxazol-2-yl)-5-fluoroisoquinoline-3-carboxylate (2l):**

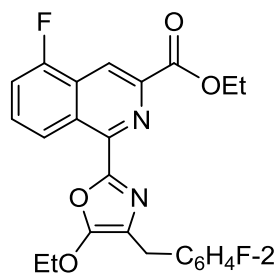

Eluent: ethyl acetate/petroleum ether (1/7). Yellow solid (50.0 mg, 57%), mp. 91–93 °C;  $R_f$  = 0.50 (ethyl acetate/petroleum ether = 1/4);  $^1\text{H}$  NMR (600 MHz,  $\text{CDCl}_3$ )  $\delta$ : 9.38 (d,  $J$  = 8.6 Hz, 1H),

8.79 (s, 1H), 7.75–7.71 (m, 1H), 7.47–7.44 (m, 1H), 7.32 (t,  $J = 7.4$  Hz, 1H), 7.21 (q,  $J = 6.2$  Hz, 1H), 7.10–7.03 (m, 2H), 4.55 (q,  $J = 7.1$  Hz, 2H), 4.39 (q,  $J = 7.1$  Hz, 2H), 3.97 (s, 2H), 1.50 (t,  $J = 7.1$  Hz, 3H), 1.41 (t,  $J = 7.1$  Hz, 3H);  $^{13}\text{C}$  NMR (151 MHz,  $\text{CDCl}_3$ )  $\delta$ : 164.98, 160.93 (d,  $J = 245.7$  Hz), 158.33 (d,  $J = 255.9$  Hz), 156.12, 149.70, 144.69, 141.13, 130.64 (d,  $J = 4.5$  Hz), 130.61, 130.54, 130.49 (d,  $J = 7.9$  Hz), 128.06 (d,  $J = 8.1$  Hz), 128.01, 127.75 (d,  $J = 3.4$  Hz), 124.02 (d,  $J = 4.4$  Hz), 123.98, 123.96, 117.18 (d,  $J = 5.0$  Hz), 116.59, 115.22 (d,  $J = 21.9$  Hz), 115.07, 114.64, 114.52 (d,  $J = 18.6$  Hz), 70.25, 62.11, 24.22, 24.20, 15.03, 14.34;  $^{19}\text{F}$  NMR (565 MHz,  $\text{CDCl}_3$ )  $\delta$ : -118.09–-118.15 (m, 1F), -120.14–120.17 (m, 1F); HRMS(ESI-TOF):  $[\text{M} + \text{Na}]^+$  calculated for  $\text{C}_{24}\text{H}_{20}\text{F}_2\text{N}_2\text{NaO}_4^+$ : 461.1283, found: 461.1298.

**Ethyl 5-bromo-1-(4-(2-bromobenzyl)-5-ethoxyoxazol-2-yl)isoquinoline-3-carboxylate (2m):**

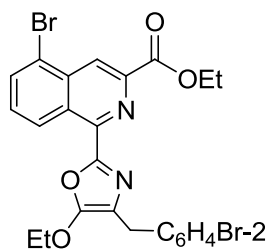

Eluent: ethyl acetate/petroleum ether (1/7). Yellow solid (49.3 mg, 44%), mp. 65–67 °C;  $R_f = 0.50$  (ethyl acetate/petroleum ether = 1/4);  $^1\text{H}$  NMR (600 MHz,  $\text{CDCl}_3$ )  $\delta$ : 9.63 (d,  $J = 8.6$  Hz, 1H), 8.92 (s, 1H), 8.06 (d,  $J = 7.5$  Hz, 1H), 7.63–7.61 (m, 1H), 7.58 (d,  $J = 8.0$  Hz, 1H), 7.31 (d,  $J = 7.3$  Hz, 1H), 7.24 (d,  $J = 7.5$  Hz, 1H), 7.10 (t,  $J = 7.1$  Hz, 1H), 4.56 (q,  $J = 7.1$  Hz, 2H), 4.38 (q,  $J = 7.0$  Hz, 2H), 4.06 (s, 2H), 1.51 (t,  $J = 7.1$  Hz, 3H), 1.39 (t,  $J = 7.1$  Hz, 3H);  $^{13}\text{C}$  NMR (151 MHz,  $\text{CDCl}_3$ )  $\delta$ : 156.37, 145.36, 142.05, 138.35, 136.09, 134.88, 132.69, 130.72, 130.44, 128.49, 128.02, 127.82, 127.39, 124.52, 123.29, 123.24, 116.15, 70.16, 62.18, 31.62, 15.07, 14.35; HRMS(ESI-TOF):  $[\text{M} + \text{Na}]^+$  calculated for  $\text{C}_{24}\text{H}_{20}\text{Br}_2\text{N}_2\text{NaO}_4^+$ : 580.9682, found: 580.9670.

**Ethyl 1-(5-ethoxy-4-(4-methoxybenzyl)oxazol-2-yl)-7-methoxyisoquinoline-3-carboxylate (2n):**

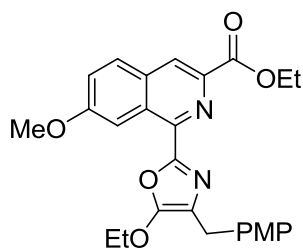

Eluent: ethyl acetate/petroleum ether (1/7). Yellow solid (62.0 mg, 67%), mp. 76–77 °C;  $R_f = 0.51$  (ethyl acetate/petroleum ether = 1/4);  $^1\text{H NMR}$  (600 MHz,  $\text{CDCl}_3$ )  $\delta$ : 8.99 (d,  $J = 2.3$  Hz, 1H), 8.49 (s, 1H), 7.85 (d,  $J = 9.0$  Hz, 1H), 7.40–7.38 (m, 1H), 7.28 (d,  $J = 8.5$  Hz, 2H), 6.83 (d,  $J = 8.6$  Hz, 2H), 4.52 (q,  $J = 7.1$  Hz, 2H), 4.42 (q,  $J = 7.1$  Hz, 2H), 3.87 (s, 3H), 3.85 (s, 2H), 3.78 (s, 3H), 1.49 (t,  $J = 7.1$  Hz, 3H), 1.45 (t,  $J = 7.1$  Hz, 3H);  $^{13}\text{C NMR}$  (151 MHz,  $\text{CDCl}_3$ )  $\delta$ : 165.59, 161.26, 158.10, 155.18, 139.01, 132.34, 131.64, 129.85, 129.72, 128.94, 124.45, 124.16, 118.03, 113.74, 105.80, 70.31, 61.82, 55.48, 55.27, 30.28, 15.16, 14.39; HRMS(ESI-TOF):  $[\text{M} + \text{Na}]^+$  calculated for  $\text{C}_{26}\text{H}_{26}\text{N}_2\text{NaO}_6^+$ : 485.1683, found: 485.1689.

**Ethyl 7-(5-ethoxy-4-(furan-2-ylmethyl)oxazol-2-yl)furo[2,3-c]pyridine-5-carboxylate (2o):**

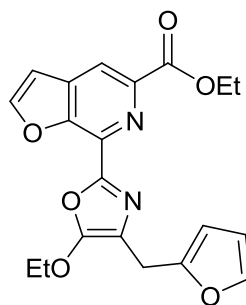

Eluent: ethyl acetate/petroleum ether (1/8). Brown liquid (32.1 mg, 42%);  $R_f = 0.50$  (ethyl acetate/petroleum ether = 1/4);  $^1\text{H NMR}$  (600 MHz,  $\text{CDCl}_3$ )  $\delta$ : 8.30 (s, 1H), 7.87 (d,  $J = 2.0$  Hz, 1H), 7.65 (s, 1H), 7.34 (s, 1H), 6.31 (d,  $J = 2.1$  Hz, 1H), 6.11 (d,  $J = 2.8$  Hz, 1H), 4.52 (q,  $J = 7.1$  Hz, 2H), 4.39 (q,  $J = 7.1$  Hz, 2H), 3.92 (s, 2H), 1.49 (t,  $J = 7.1$  Hz, 3H), 1.41 (t,  $J = 7.1$  Hz, 3H);  $^{13}\text{C NMR}$  (151 MHz,  $\text{CDCl}_3$ )  $\delta$ : 165.11, 160.47, 155.76, 152.52, 148.80, 143.48, 141.33, 139.85, 124.82, 115.81, 110.38, 109.42, 107.68, 106.17, 70.58, 62.18, 24.45, 15.03, 14.33; HRMS(ESI-TOF):  $[\text{M} + \text{Na}]^+$  calculated for  $\text{C}_{20}\text{H}_{18}\text{N}_2\text{NaO}_6^+$ : 405.1057, found: 405.1065.

**Methyl 1-(4-benzhydryl-5-methoxyoxazol-2-yl)-4-phenylisoquinoline-3-carboxylate (2p):**

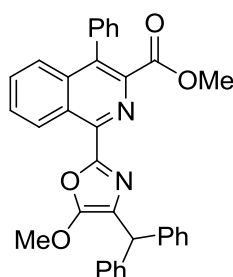

Eluent: ethyl acetate/petroleum ether (1/7). Brown liquid (75.8 mg, 72%);  $R_f = 0.45$  (ethyl acetate/petroleum ether = 1/4);  $^1\text{H NMR}$  (600 MHz,  $\text{CDCl}_3$ )  $\delta$ : 9.56 (d,  $J = 8.6$  Hz, 1H), 7.73–7.70 (m, 1H), 7.65 (d,  $J = 3.5$  Hz, 2H), 7.53–7.48 (m, 3H), 7.41 (d,  $J = 7.4$  Hz, 4H), 7.36–7.30 (m, 6H), 7.25–7.22 (m, 2H), 5.47 (s, 1H), 3.99 (s, 3H), 3.73 (s, 3H);  $^{13}\text{C NMR}$  (151 MHz,  $\text{CDCl}_3$ )  $\delta$ : 142.61, 140.69, 136.80, 135.95, 134.99, 130.82, 129.65, 129.63, 128.94, 128.33, 128.26, 128.13, 127.89, 126.76, 126.51, 126.49, 119.59, 60.77, 52.48, 47.15; HRMS(ESI-TOF):  $[\text{M} + \text{Na}]^+$  calculated for  $\text{C}_{34}\text{H}_{26}\text{N}_2\text{NaO}_4^+$ : 549.1785, found: 549.1789.

**(1-(4-Benzhydryl-5-morpholinooxazol-2-yl)-4-phenylisoquinolin-3-yl)(morpholino)methanone (2q):**

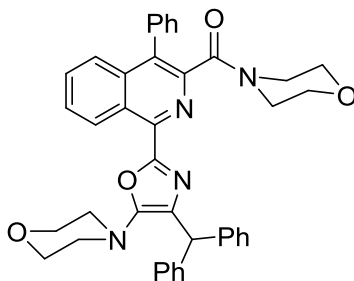

Eluent: acetone/petroleum ether (1/10). Brown liquid (87.9 mg, 69%);  $R_f = 0.50$  (acetone/petroleum ether = 2/5);  $^1\text{H NMR}$  (600 MHz,  $\text{CDCl}_3$ )  $\delta$ : 9.45–9.43 (m, 1H), 7.76–7.74 (m, 1H), 7.69–7.67 (m, 1H), 7.65–7.63 (m, 2H), 7.53–7.50 (m, 3H), 7.49–7.47 (t,  $J = 6.3$  Hz, 3H), 7.42 (d,  $J = 7.7$  Hz, 3H), 7.33 (t,  $J = 7.6$  Hz, 4H), 7.24 (d,  $J = 7.3$  Hz, 1H), 5.52 (s, 1H), 3.77–3.75 (m, 4H), 3.62–3.60 (m, 2H), 3.50–3.49 (m, 2H), 3.26–3.24 (m, 2H), 3.17–3.13 (m, 6H);  $^{13}\text{C NMR}$  (151 MHz,  $\text{CDCl}_3$ )  $\delta$ : 167.36, 142.90, 136.01, 134.64, 132.08, 130.77, 130.69, 130.55, 129.05, 128.68, 128.62, 128.54, 128.46, 128.34, 127.94, 126.51, 126.11, 125.73, 66.82, 66.50, 50.79, 47.76, 46.90, 41.74; HRMS(ESI-TOF):  $[\text{M} + \text{Na}]^+$  calculated for  $\text{C}_{40}\text{H}_{36}\text{N}_4\text{NaO}_4^+$ : 659.2629, found: 659.2639.

### III. General Procedure for the Preparation of 3 (3a as Example):

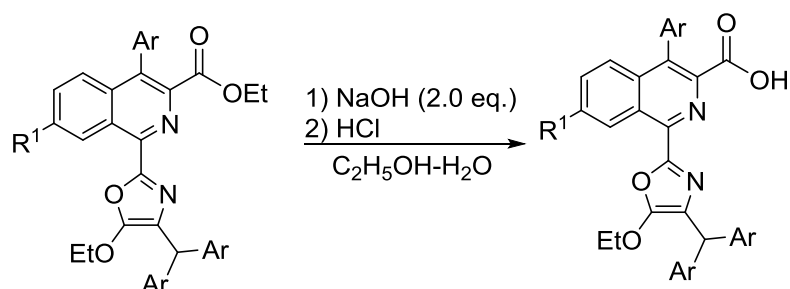

**2a**, Ar = C<sub>6</sub>H<sub>5</sub>, R<sup>1</sup> = H  
**2d**, Ar = C<sub>6</sub>H<sub>4</sub>Me-*p*, R<sup>1</sup> = Me

**3a**, Ar = C<sub>6</sub>H<sub>5</sub>, R<sup>1</sup> = H, 99%  
**3d**, Ar = C<sub>6</sub>H<sub>4</sub>Me-*p*, R<sup>1</sup> = Me, 98%

To a suspension solution of **2a** (0.5 mmol, 277.3 mg) in a C<sub>2</sub>H<sub>5</sub>OH/H<sub>2</sub>O (10 mL, v/v = 1/1) was added the NaOH (40.0 mg, 1.0 mmol). The reaction mixture was stirred for 8 h under refluxing until compound **2a** was consumed (monitored by TLC). The reaction mixture was poured into saturated aqueous NaCl (15.0 mL), followed by acidification with HCl solution to adjust the pH value of the solution to 4, and extracted with CH<sub>2</sub>Cl<sub>2</sub> (6 mL × 3). The combined organic extracts were dried over anhydrous MgSO<sub>4</sub>, filtered and concentrated under reduced pressure to yield the product **3a** (260.7 mg, 99%), which may be used in the next step without purification.

#### 1-(4-Benzhydryl-5-ethoxyoxazol-2-yl)-4-phenylisoquinoline-3-carboxylic acid (3a):

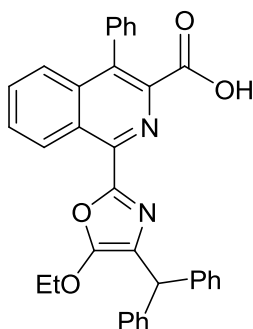

Yellow solid (260.7 mg, 99%); mp. 179–180 °C; R<sub>f</sub> = 0.45 (acetone/acetic acid/petroleum ether = 1/1/5); <sup>1</sup>H NMR (600 MHz, DMSO-*d*<sub>6</sub>) δ: 13.17 (s, 1H), 9.43 (d, *J* = 7.5 Hz, 1H), 7.85–7.77 (m, 2H), 7.59 (d, *J* = 7.4 Hz, 1H), 7.55–7.50 (m, 3H), 7.44 (d, *J* = 6.3 Hz, 4H), 7.41–7.38 (m, 2H), 7.35 (s, 4H), 7.24 (s, 2H), 5.51 (s, 1H), 4.30–4.22 (m, 2H), 1.24 (s, 3H); <sup>13</sup>C NMR (151 MHz, DMSO-*d*<sub>6</sub>) δ: 168.33, 155.66, 143.31, 142.99, 136.30, 135.42, 131.95, 131.83, 130.38, 129.89, 129.09, 128.82, 128.78, 128.72, 127.23, 126.94, 126.43, 125.64, 120.66, 71.27, 46.66, 15.23; HRMS(ESI-TOF): [M + Na]<sup>+</sup> calculated for C<sub>34</sub>H<sub>26</sub>N<sub>2</sub>NaO<sub>4</sub><sup>+</sup>: 549.1785, found: 549.1760.

**1-(4-(Di-*p*-tolylmethyl)-5-ethoxyoxazol-2-yl)-7-methyl-4-(*p*-tolyl)isoquinoline-3-carboxylic acid (3d):**

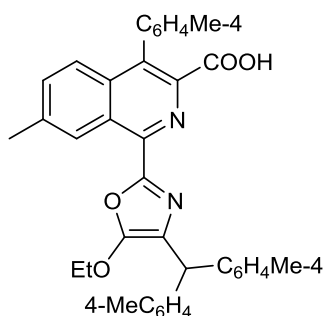

Yellow solid (285.5 mg, 98%); mp. 185–186 °C;  $R_f = 0.45$  (acetone/acetic acid/petroleum ether = 1/1/5);  $^1\text{H NMR}$  (600 MHz,  $\text{DMSO-}d_6$ )  $\delta$ : 8.90 (s, 1H), 7.36 (d,  $J = 8.5$  Hz, 1H), 7.31 (d,  $J = 8.6$  Hz, 1H), 7.17 (d,  $J = 7.5$  Hz, 4H), 7.14 (d,  $J = 7.4$  Hz, 2H), 7.10 (d,  $J = 7.3$  Hz, 2H), 7.00 (d,  $J = 7.5$  Hz, 4H), 5.21 (s, 1H), 4.12 (q,  $J = 6.8$  Hz, 2H), 2.32 (s, 3H), 2.24 (s, 3H), 2.12 (s, 6H), 1.12 (t,  $J = 6.9$  Hz, 3H);  $^{13}\text{C NMR}$  (151 MHz,  $\text{DMSO-}d_6$ )  $\delta$ : 171.54, 154.87, 151.10, 140.49, 137.06, 136.74, 135.82, 134.93, 134.19, 132.62, 130.68, 129.27, 128.91, 128.85, 127.54, 125.83, 125.71, 120.44, 71.16, 45.61, 22.03, 21.35, 21.05, 15.26; HRMS(ESI-TOF):  $[\text{M} + \text{Na}]^+$  calculated for  $\text{C}_{38}\text{H}_{34}\text{N}_2\text{NaO}_4^+$ : 605.2411, found: 605.2408.

#### IV. General Procedure for the Preparation of 4 (4a as Example):

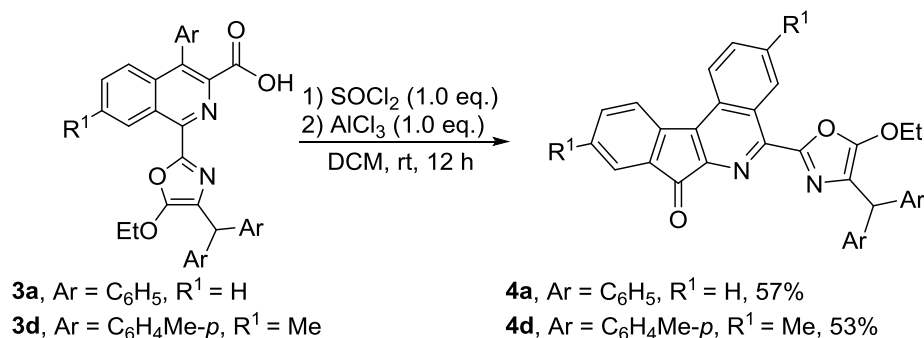

To a solution of thionyl chloride (0.6 mmol) in CH<sub>2</sub>Cl<sub>2</sub> (15.0 mL) was slowly added the **3a** (0.5 mmol, 263 mg) under nitrogen atmosphere at room temperature. After the reaction mixture was stirred for 12 h at room temperature, AlCl<sub>3</sub> (0.6 mmol, 80.0 mg) was added in one-pot. After the reaction mixture was stirred at room temperature for 1 h, the mixture was poured into saturated aqueous NaCl (15.0 mL), followed by basification with saturated aqueous NaHCO<sub>3</sub> solution to adjust the pH value of the solution to 7, and extracted with CH<sub>2</sub>Cl<sub>2</sub> (6 mL × 3). The combined organic extracts were dried over anhydrous MgSO<sub>4</sub>, filtered and concentrated under reduced pressure to yield the crude product, which was purified by chromatography (acetone/petroleum ether = 3:10, V/V) to give **4a** (144.9 mg, 57%) as a red solid.

#### 5-(4-Benzhydryl-5-ethoxyoxazol-2-yl)-7H-indeno[2,1-c]isoquinolin-7-one (4a):

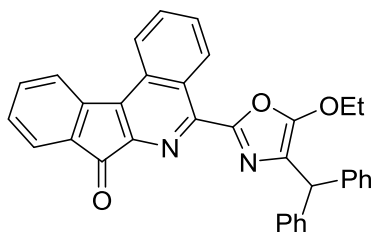

Eluent: acetone/petroleum ether (1/4). Red solid (144.9 mg, 57%), mp. 92–94 °C; R<sub>f</sub> = 0.45 (acetone/petroleum ether = 2/5); <sup>1</sup>H NMR (600 MHz, CDCl<sub>3</sub>) δ: 9.60 (d, *J* = 8.6 Hz, 1H), 8.44 (d, *J* = 8.4 Hz, 1H), 7.99 (d, *J* = 7.5 Hz, 1H), 7.82 (t, *J* = 7.6 Hz, 1H), 7.76–7.72 (m, 2H), 7.56 (t, *J* = 7.5 Hz, 1H), 7.40 (d, *J* = 7.5 Hz, 4H), 7.37 (t, *J* = 7.4 Hz, 1H), 7.32 (t, *J* = 7.6 Hz, 4H), 7.24 (t, *J* = 7.3 Hz, 2H), 5.47 (s, 1H), 4.30 (q, *J* = 7.1 Hz, 2H), 1.30 (t, *J* = 7.1 Hz, 3H); <sup>13</sup>C NMR (151 MHz, CDCl<sub>3</sub>) δ: 192.48, 155.92, 150.13, 145.76, 145.17, 142.64, 142.06, 136.74, 135.00, 133.01, 132.15, 131.69, 130.62, 129.75, 129.71, 128.95, 128.40, 128.27, 126.46, 124.49, 124.02, 123.86, 120.39, 70.29, 47.16, 14.95; HRMS(ESI-TOF): [M + Na]<sup>+</sup> calculated for C<sub>34</sub>H<sub>24</sub>N<sub>2</sub>NaO<sub>3</sub><sup>+</sup>: 531.1679, found: 531.1668.



**5-(4-(Di-*p*-tolylmethyl)-5-ethoxyoxazol-2-yl)-3,9-dimethyl-7*H*-indeno[2,1-*c*]isoquinolin-7-one**

**(4d):**

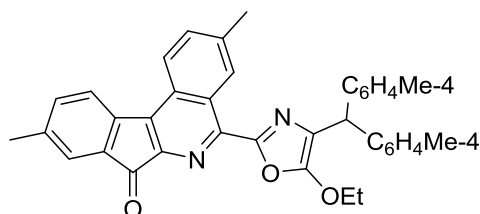

Eluent: acetone/petroleum ether (1/4). Red solid (149.6 mg, 53%), mp. 112–114 °C;  $R_f = 0.45$  (acetone/petroleum ether = 2/5);  $^1\text{H NMR}$  (600 MHz,  $\text{CDCl}_3$ )  $\delta$ : 9.27 (s, 1H), 8.21 (d,  $J = 8.6$  Hz, 1H), 7.74 (d,  $J = 7.6$  Hz, 1H), 7.57 (d,  $J = 8.5$  Hz, 1H), 7.48 (s, 1H), 7.31 (d,  $J = 8.0$  Hz, 4H), 7.27 (d,  $J = 7.7$  Hz, 1H), 7.13 (d,  $J = 7.9$  Hz, 4H), 5.37 (s, 1H), 4.34 (q,  $J = 7.0$  Hz, 2H), 2.51 (s, 3H), 2.36 (s, 3H), 2.32 (s, 6H), 1.34 (t,  $J = 7.1$  Hz, 3H);  $^{13}\text{C NMR}$  (151 MHz,  $\text{CDCl}_3$ )  $\delta$ : 192.77, 155.52, 150.16, 144.63, 144.44, 141.05, 140.10, 140.07, 139.16, 137.16, 135.84, 135.02, 133.57, 133.33, 130.03, 128.93, 128.78, 128.69, 125.15, 123.82, 123.54, 120.43, 70.34, 46.02, 22.32, 21.33, 21.00, 15.03; HRMS(ESI-TOF):  $[\text{M} + \text{Na}]^+$  calculated for  $\text{C}_{38}\text{H}_{32}\text{N}_2\text{NaO}_3^+$ : 587.2305, found: 587.2302.

## V. ORTEP Drawing of Compound 2k:

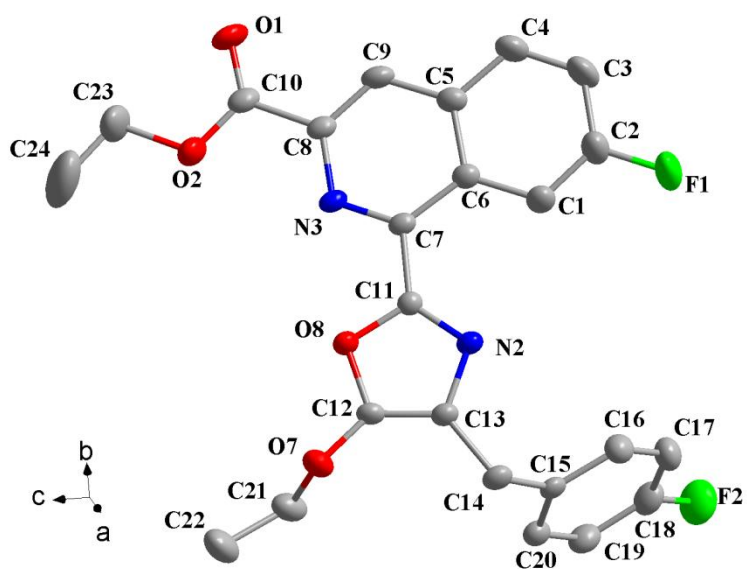

Figure 1. Crystal ORTEP drawing of compound 2k

## VI. Copies of $^1\text{H}$ NMR, $^{13}\text{C}$ NMR and $^{19}\text{F}$ NMR Spectra of Compounds 2-4:

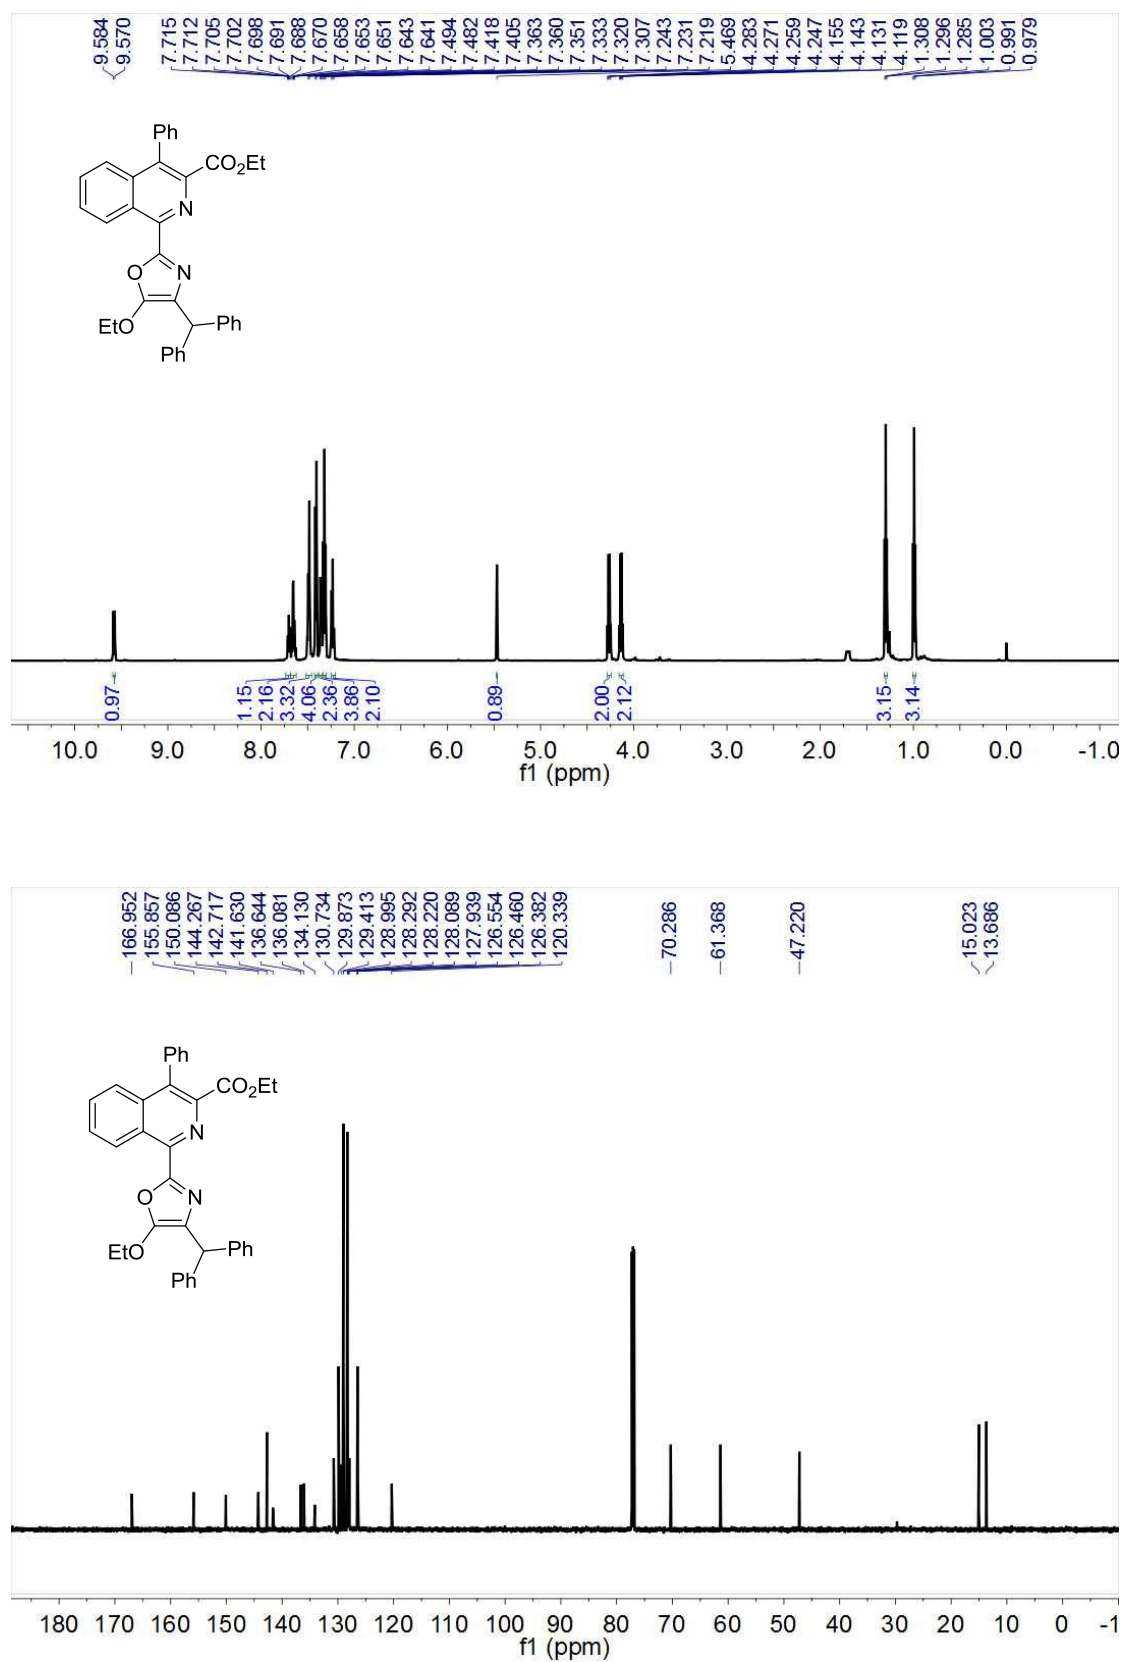

Figure 2.  $^1\text{H}$ - (upper) and  $^{13}\text{C}$ -NMR (lower) spectra of compound 2a

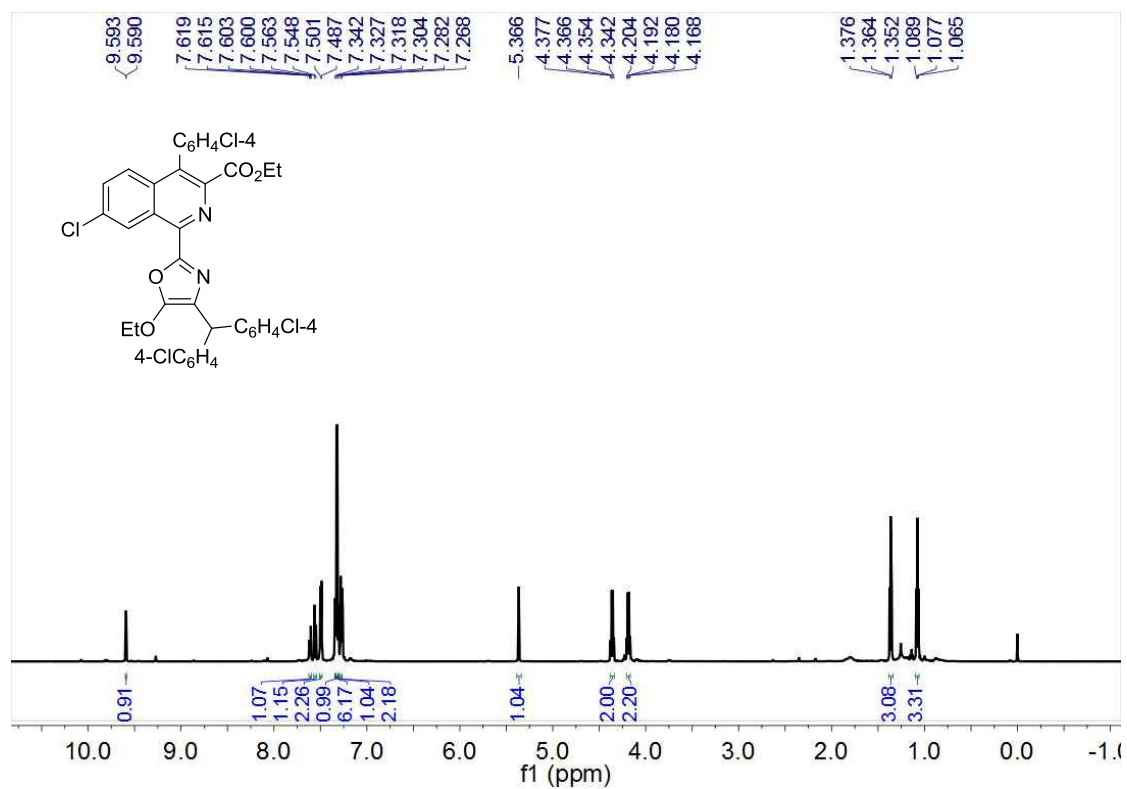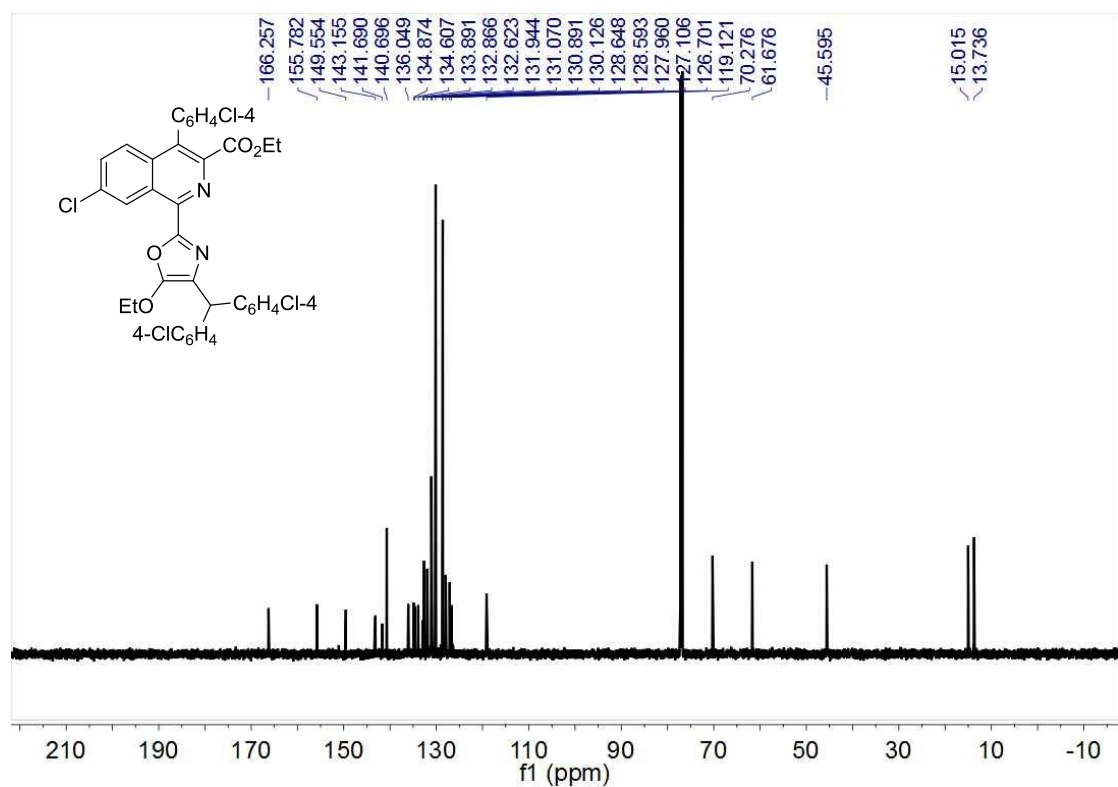

**Figure 3.**  $^1H$ - (upper) and  $^{13}C$ -NMR (lower) spectra of compound **2b**

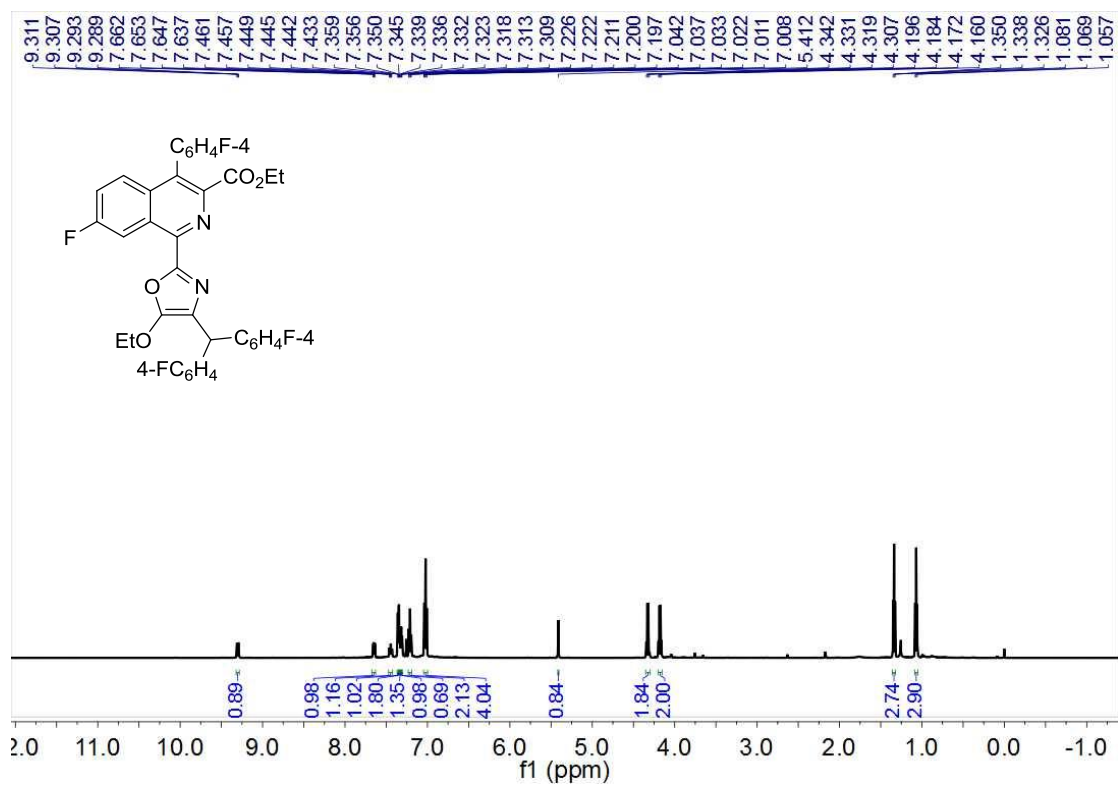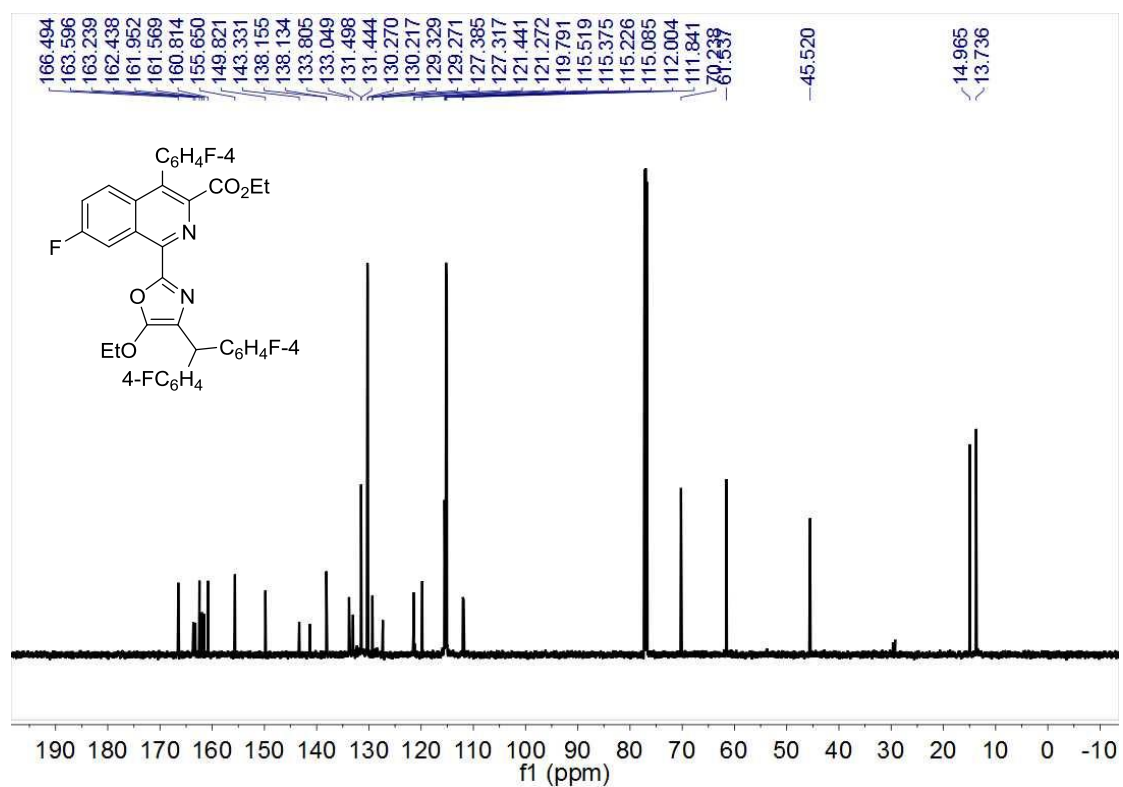

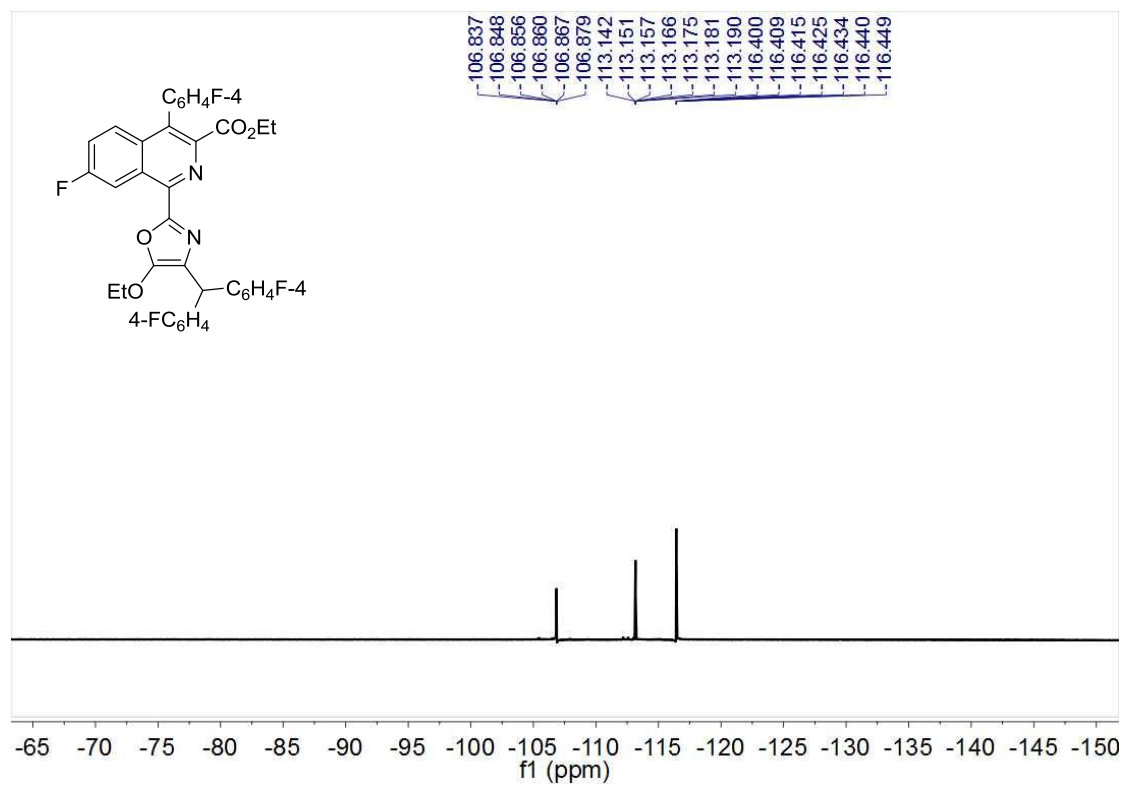

**Figure 4.**  $^1H$  NMR,  $^{13}C$  NMR and  $^{19}F$  NMR spectra of compound **2c**

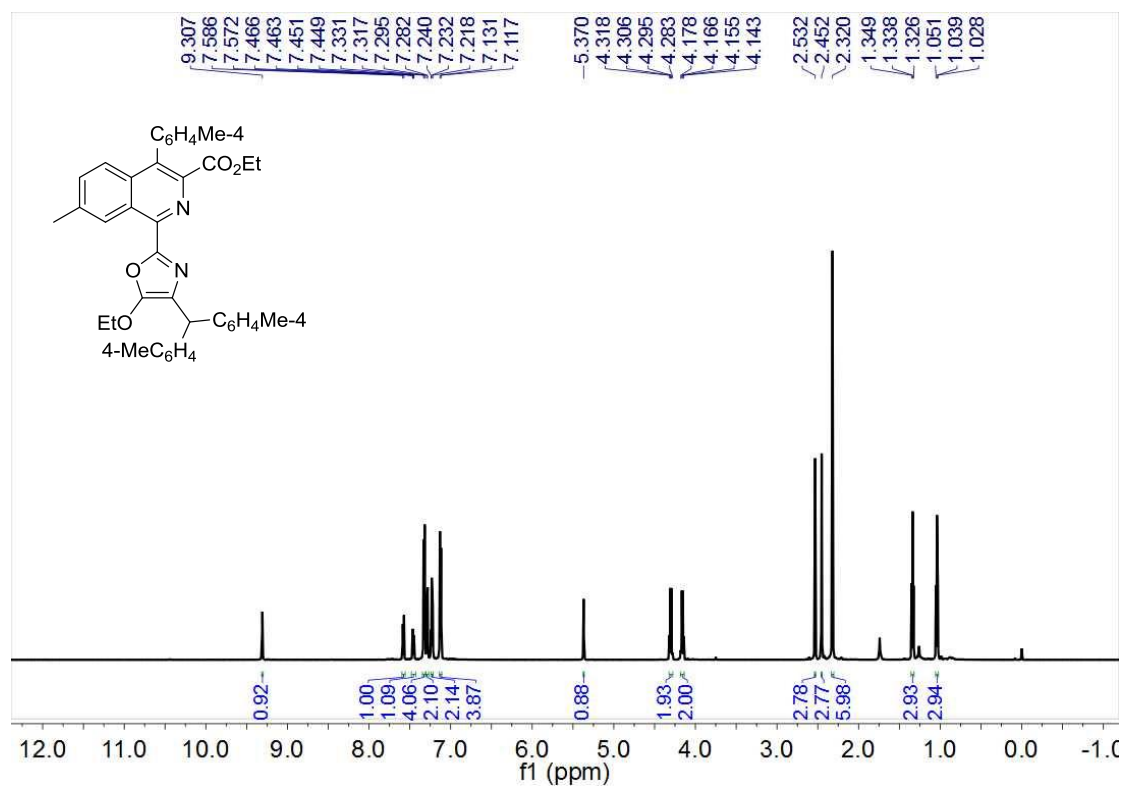

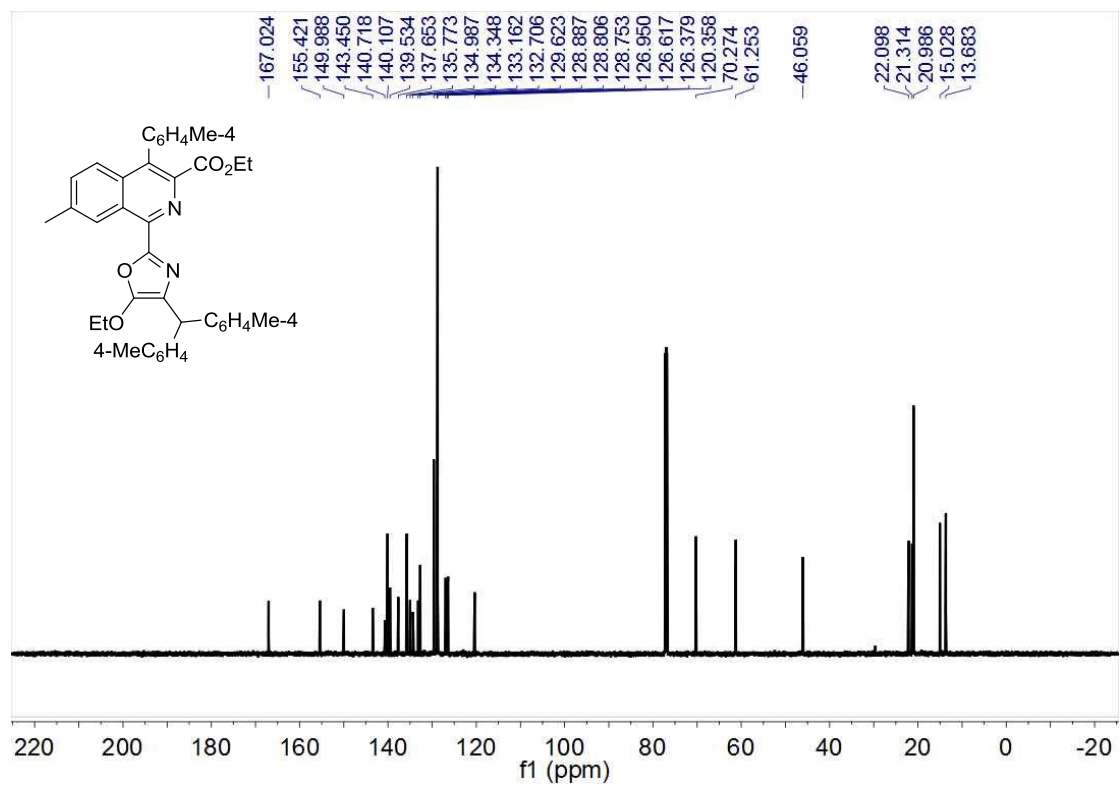

Figure 5. <sup>1</sup>H- (upper) and <sup>13</sup>C-NMR (lower) spectra of compound 2d

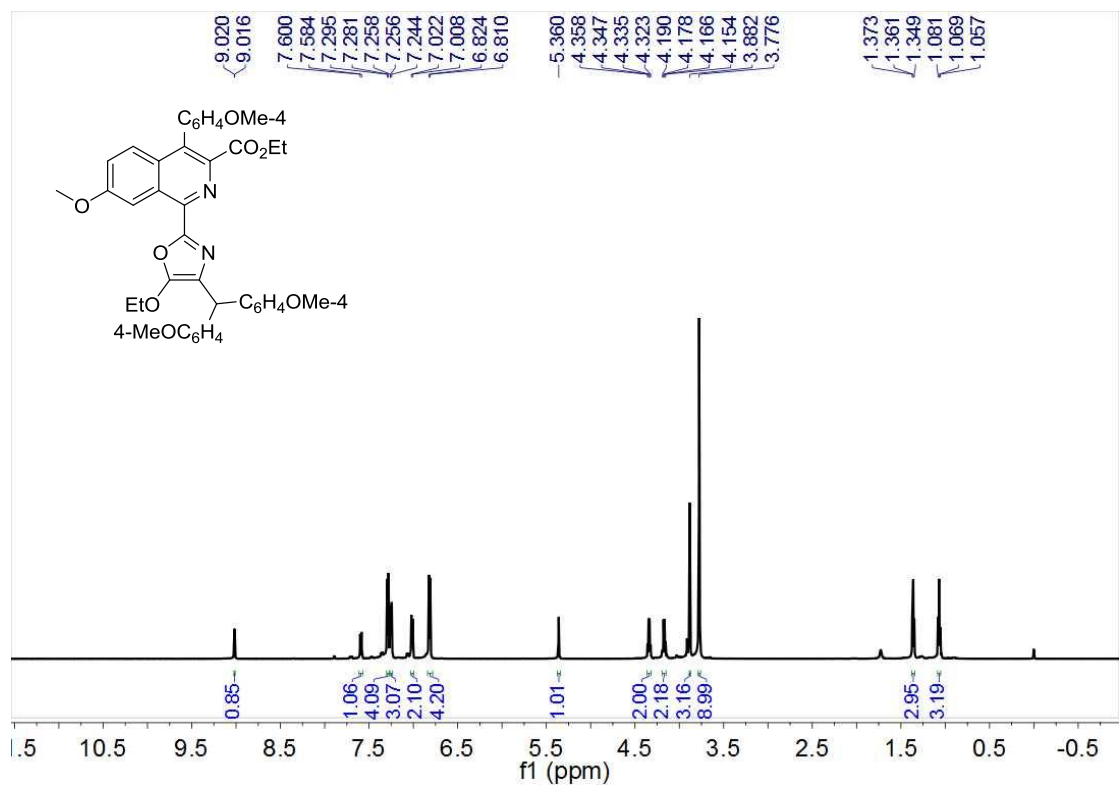

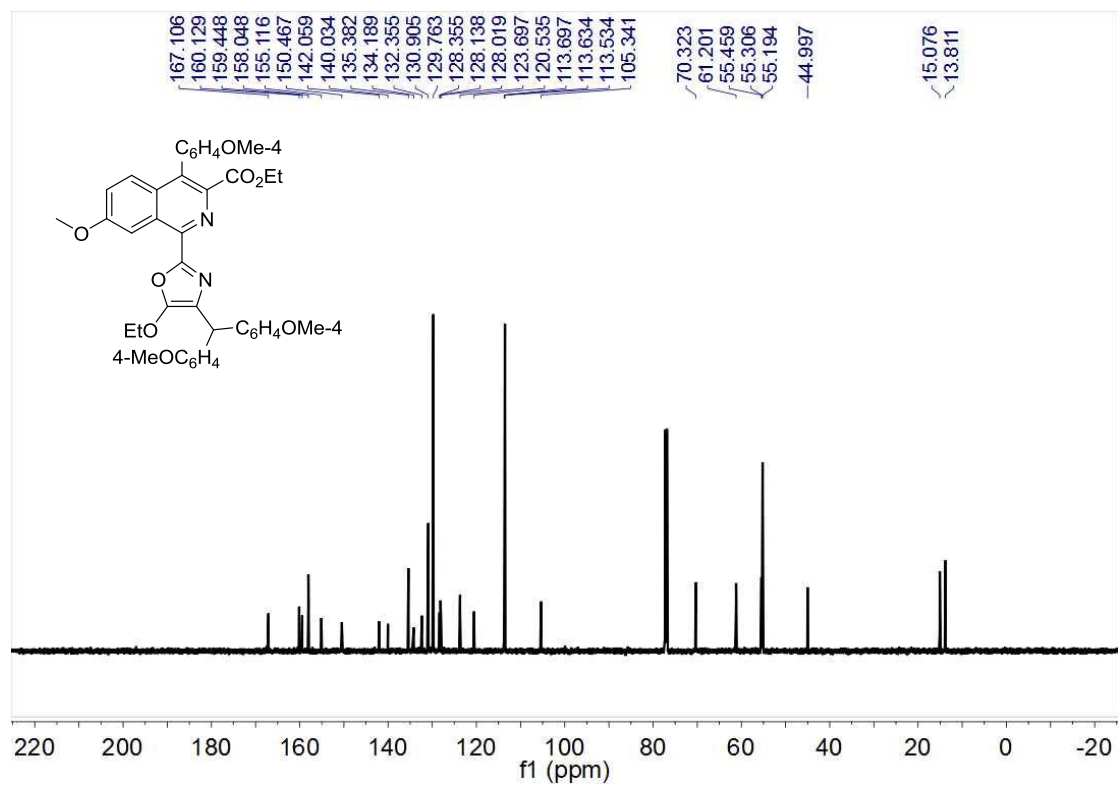

Figure 6. <sup>1</sup>H- (upper) and <sup>13</sup>C-NMR (lower) spectra of compound **2e**

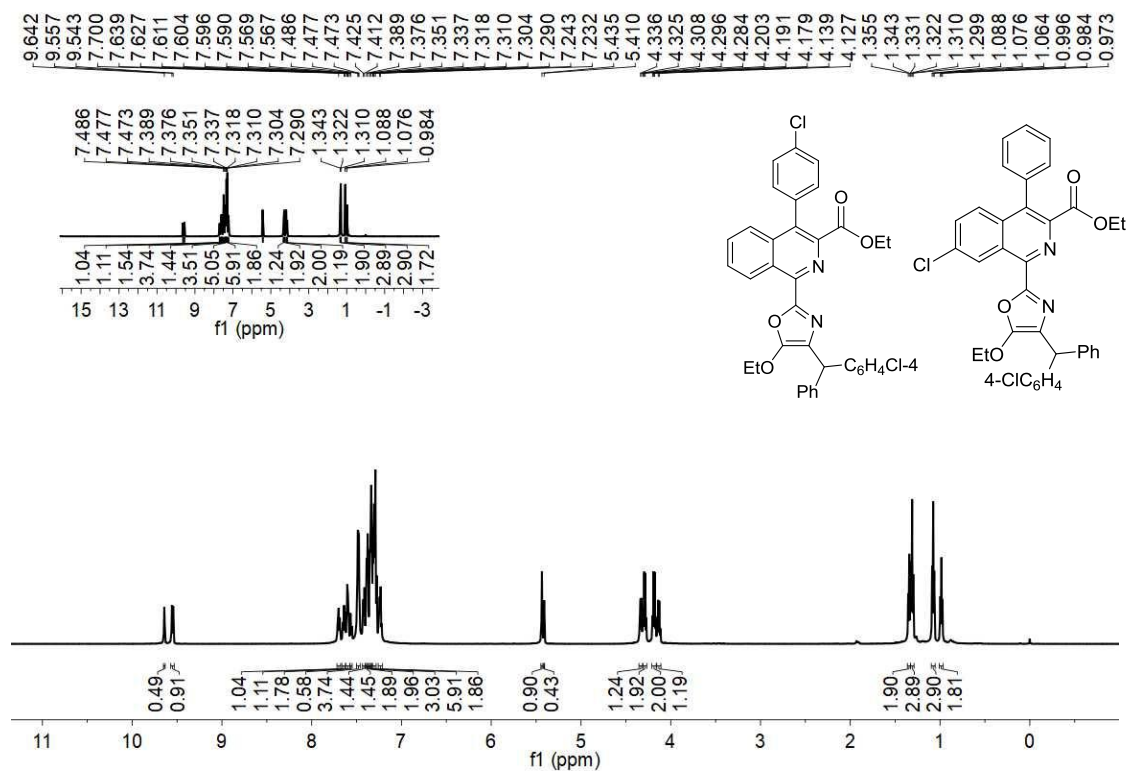



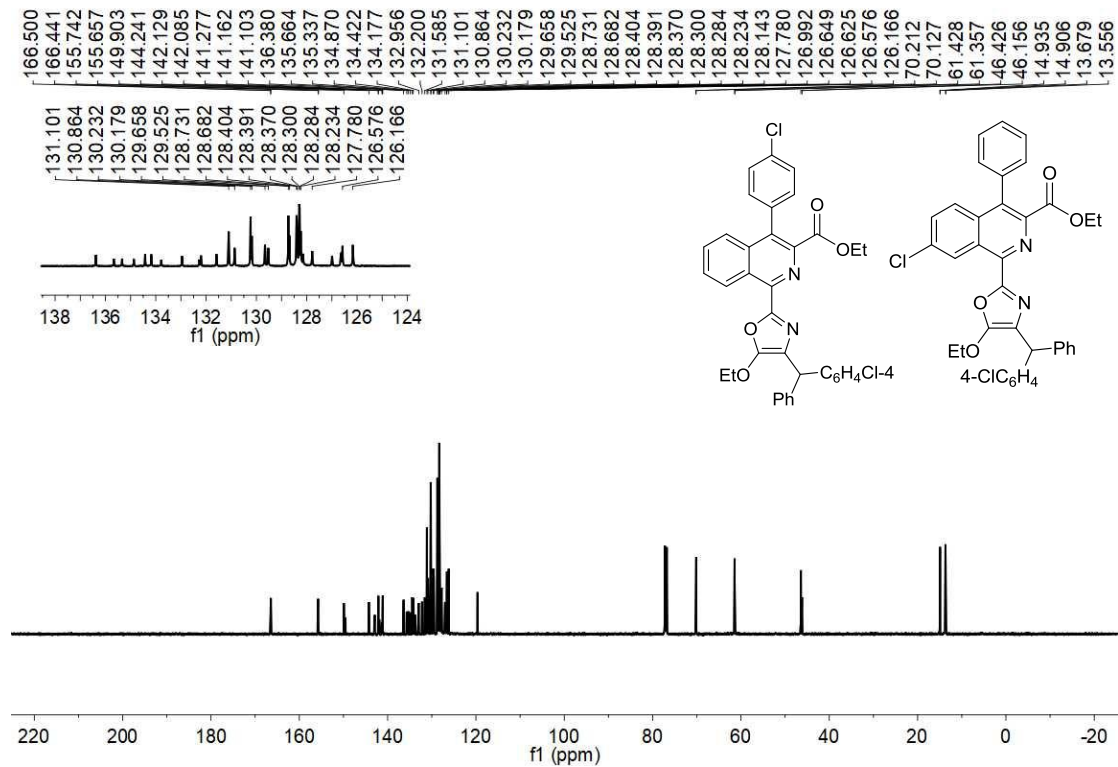

Figure 7. <sup>1</sup>H- (upper) and <sup>13</sup>C-NMR (lower) spectra of compound 2f and 2f'

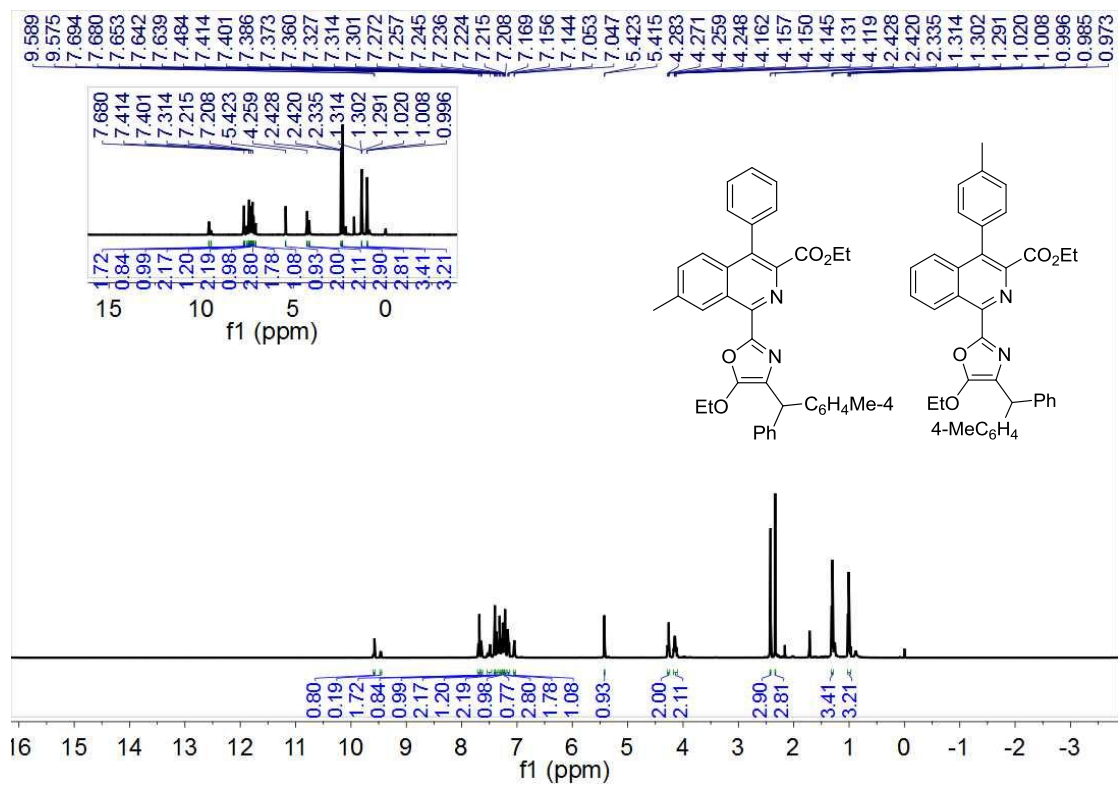

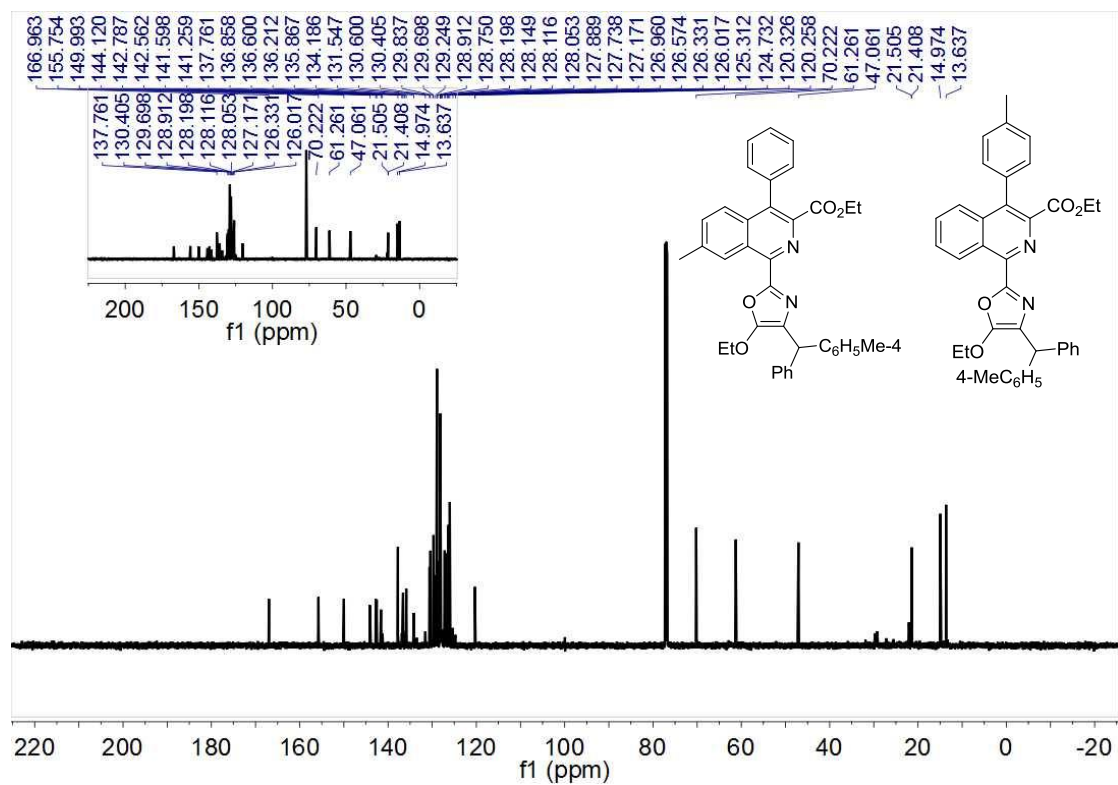

**Figure 8.**  $^1\text{H}$ - (upper) and  $^{13}\text{C}$ -NMR (lower) spectra of compound **2g** and **2g'**

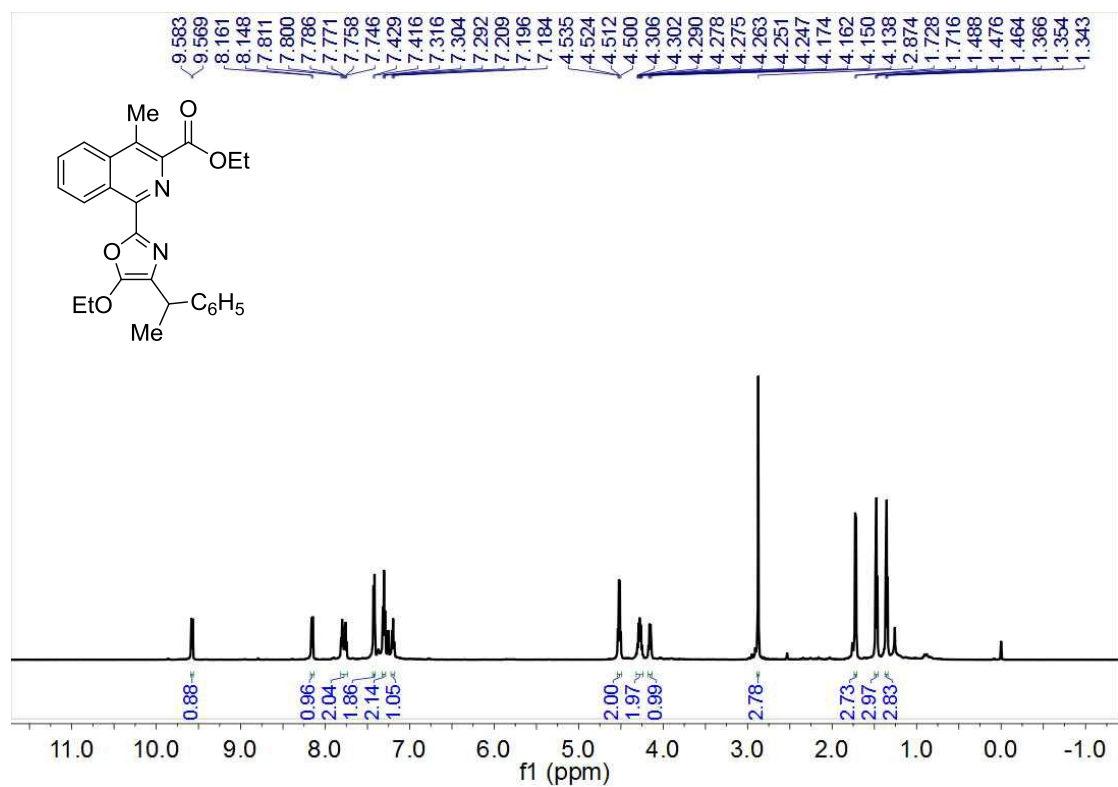

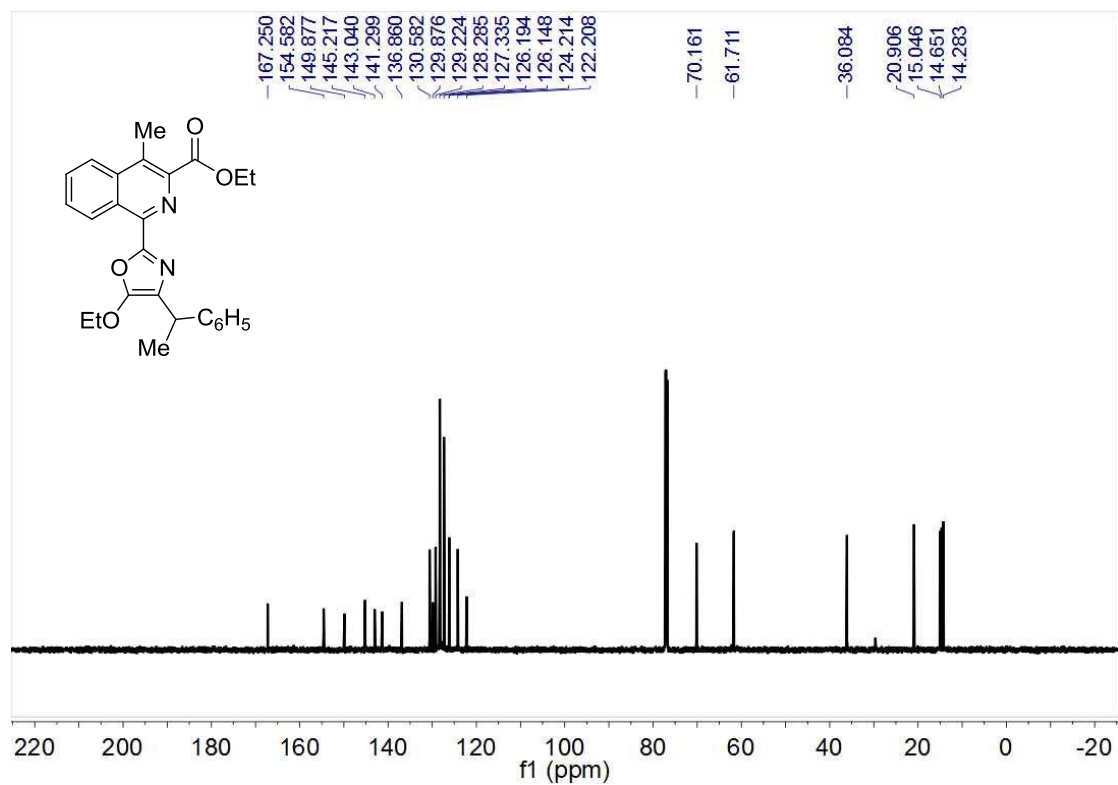

Figure 9. <sup>1</sup>H- (upper) and <sup>13</sup>C-NMR (lower) spectra of compound 2h

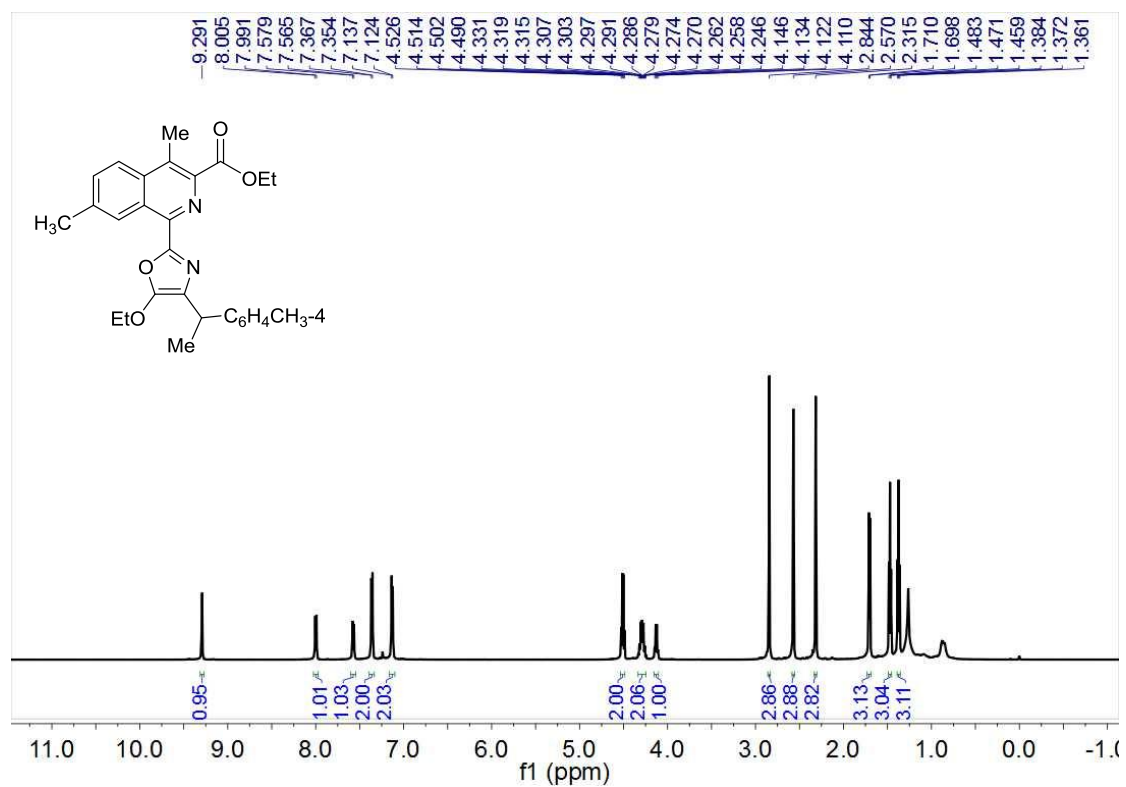

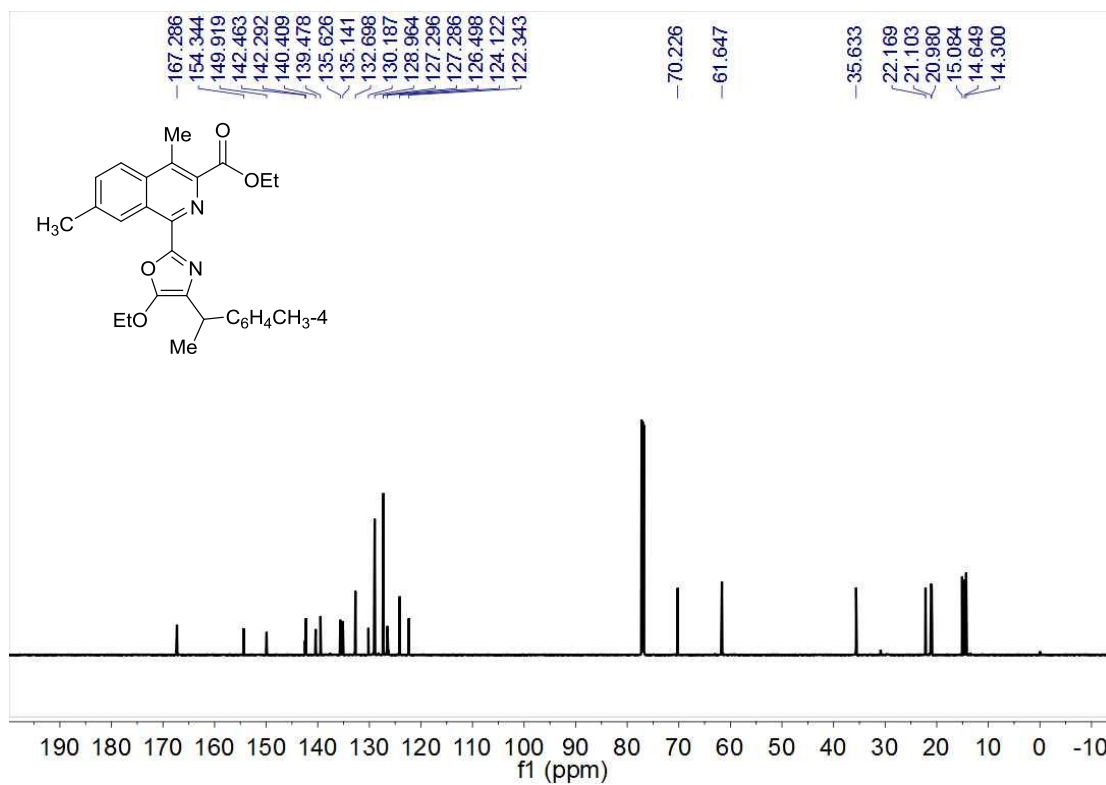

**Figure 10.** <sup>1</sup>H- (upper) and <sup>13</sup>C-NMR (lower) spectra of compound **2i**

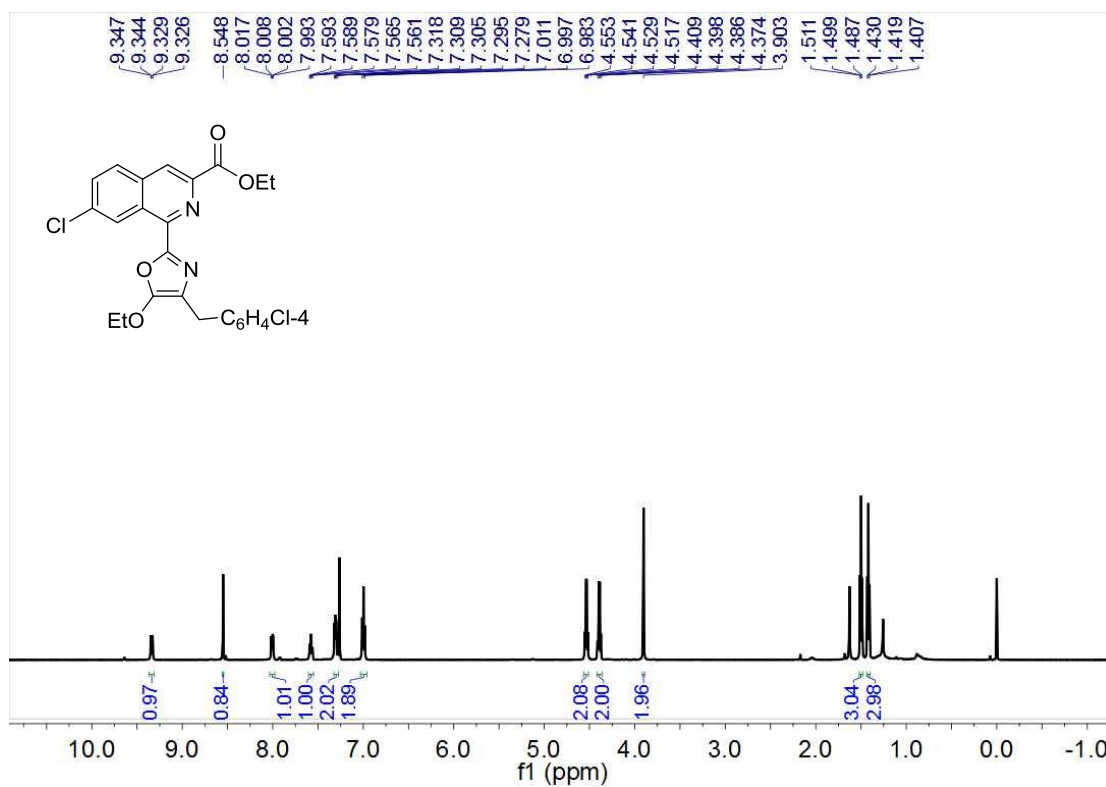

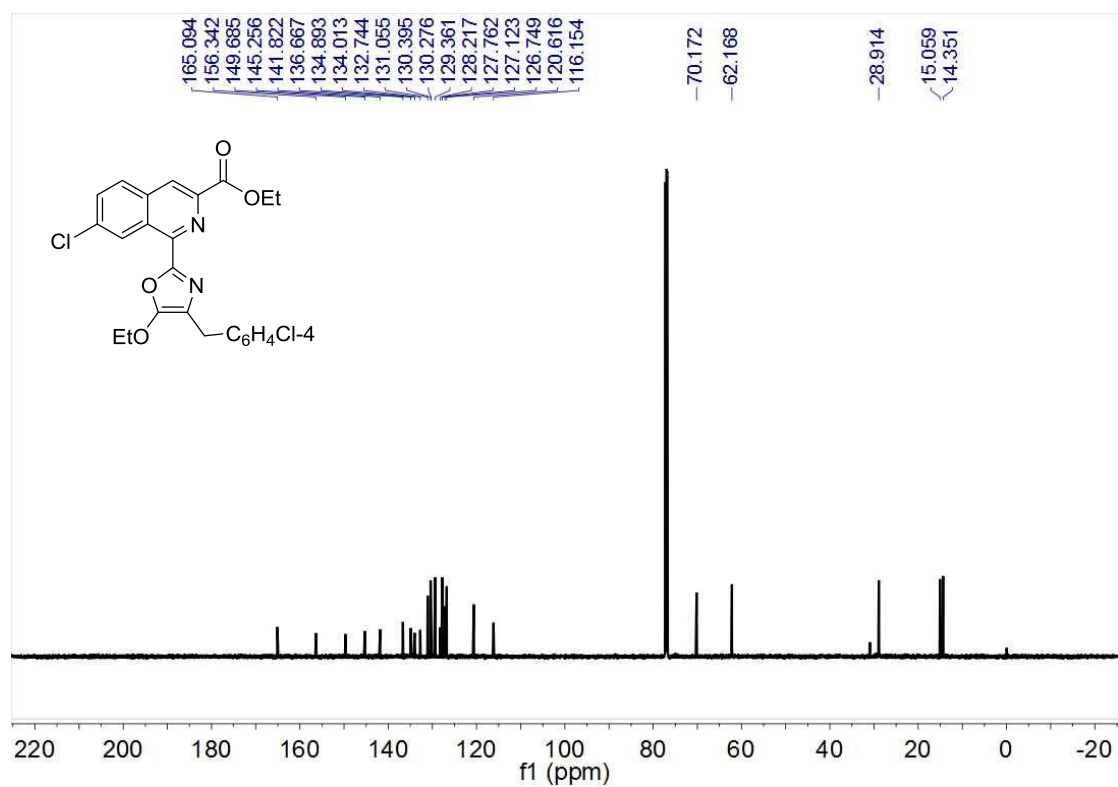

**Figure 11.** <sup>1</sup>H- (upper) and <sup>13</sup>C-NMR (lower) spectra of compound **2j**

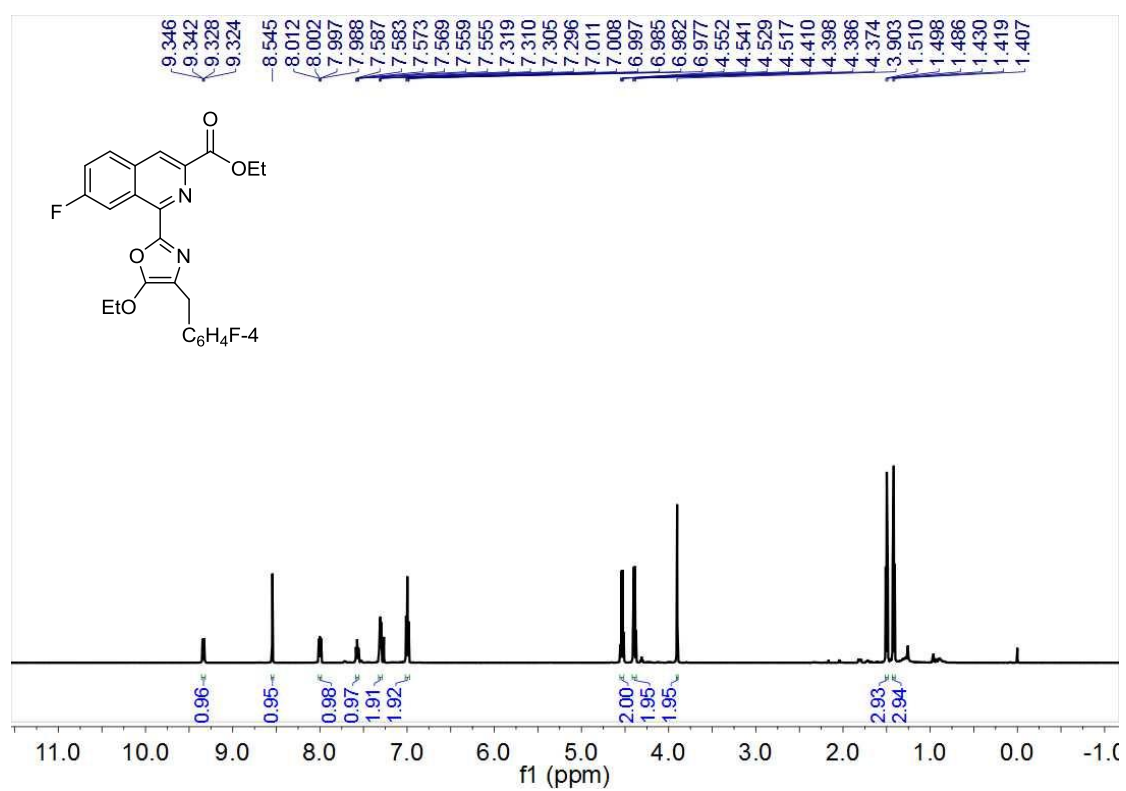

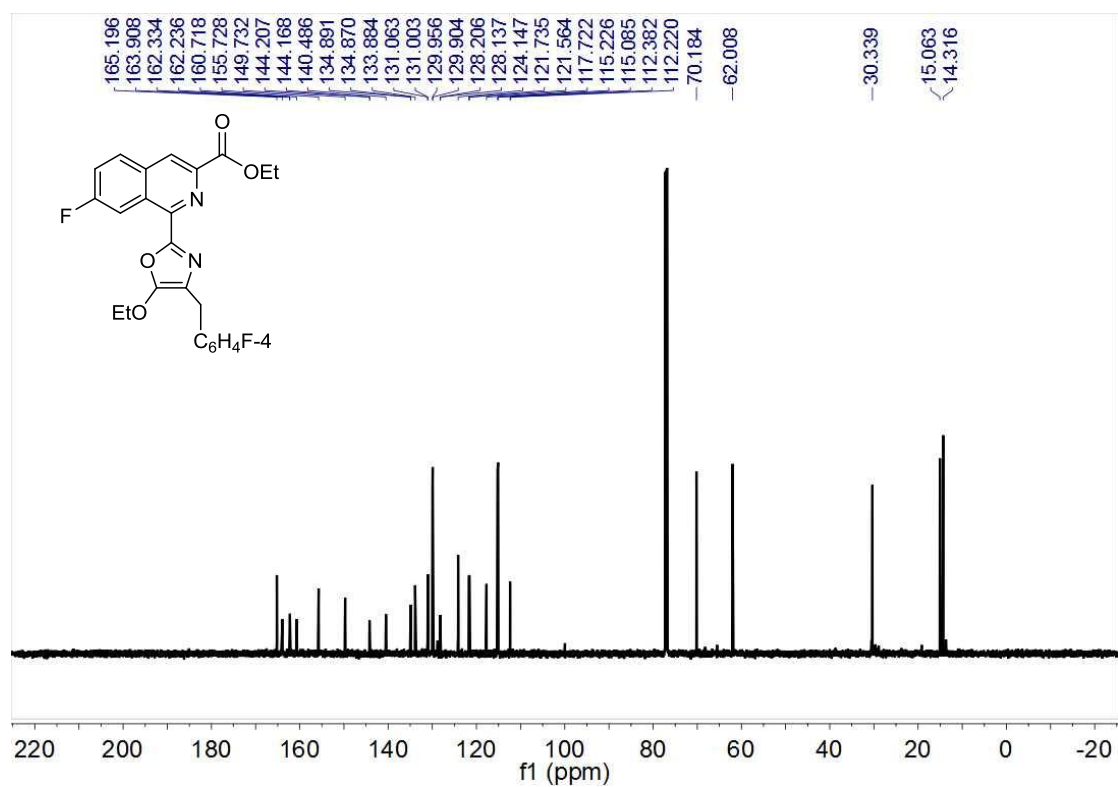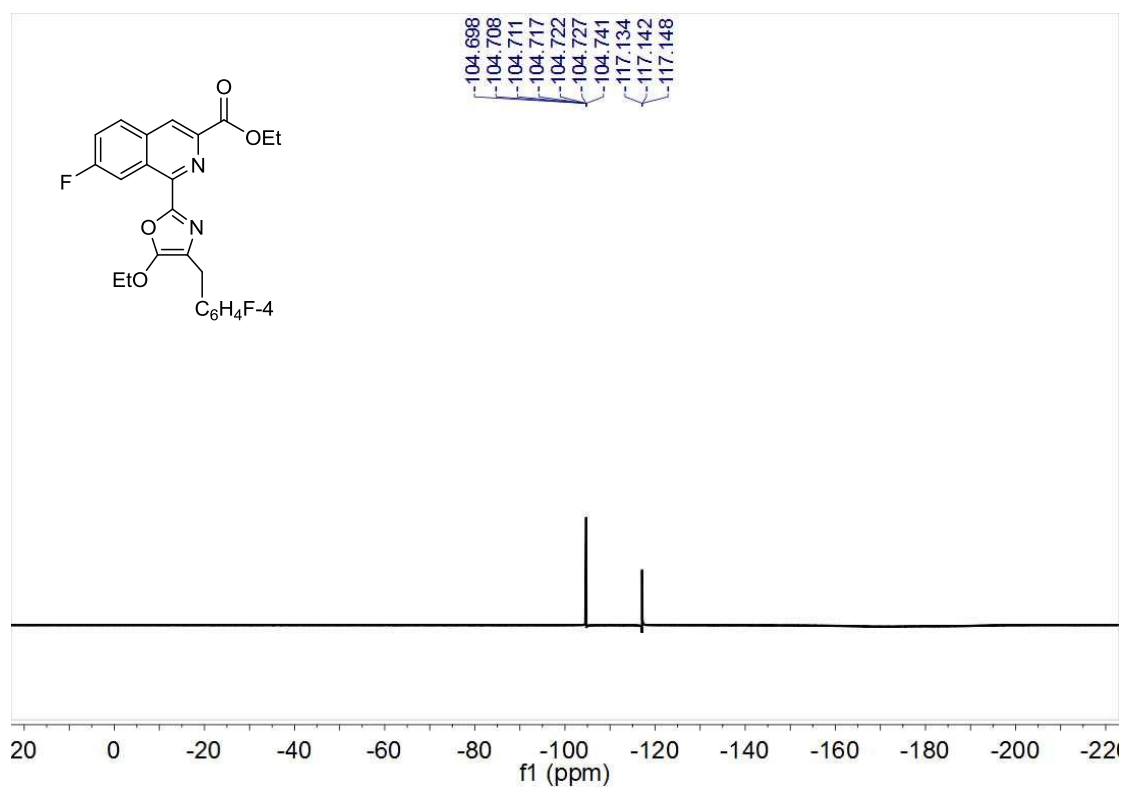

**Figure 12.** <sup>1</sup>H NMR, <sup>13</sup>C NMR and <sup>19</sup>F NMR spectra of compound **2k**

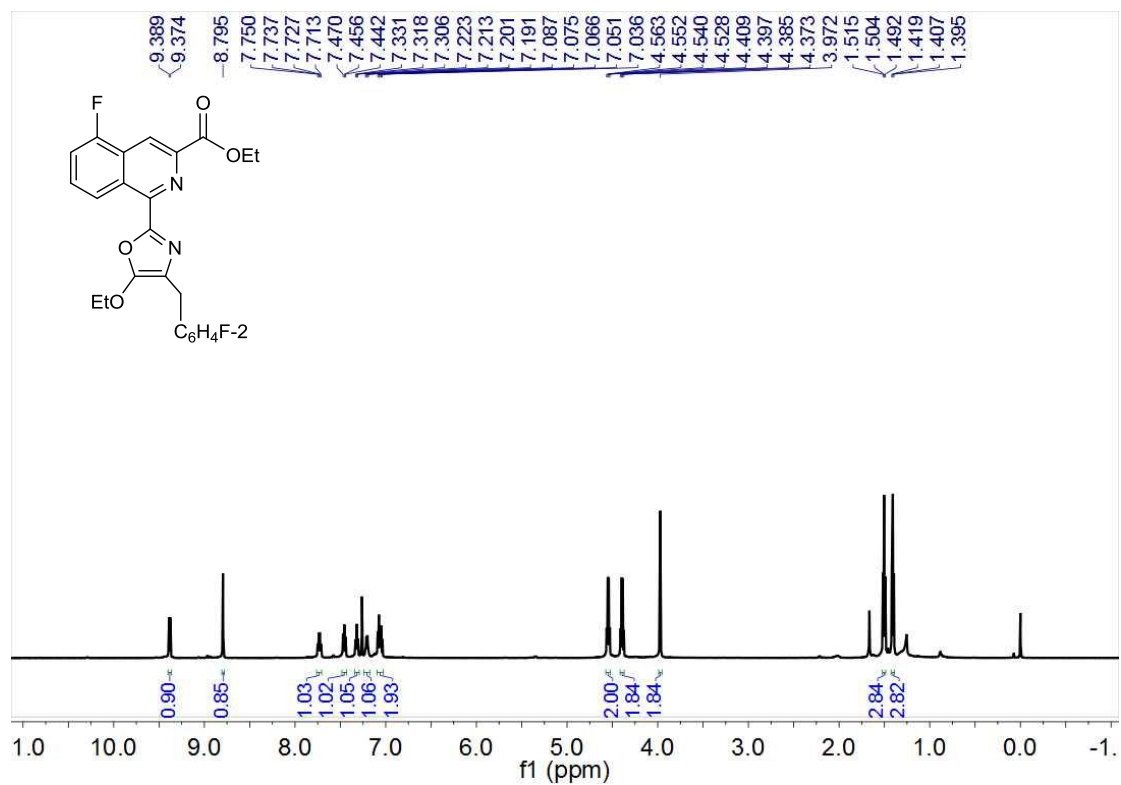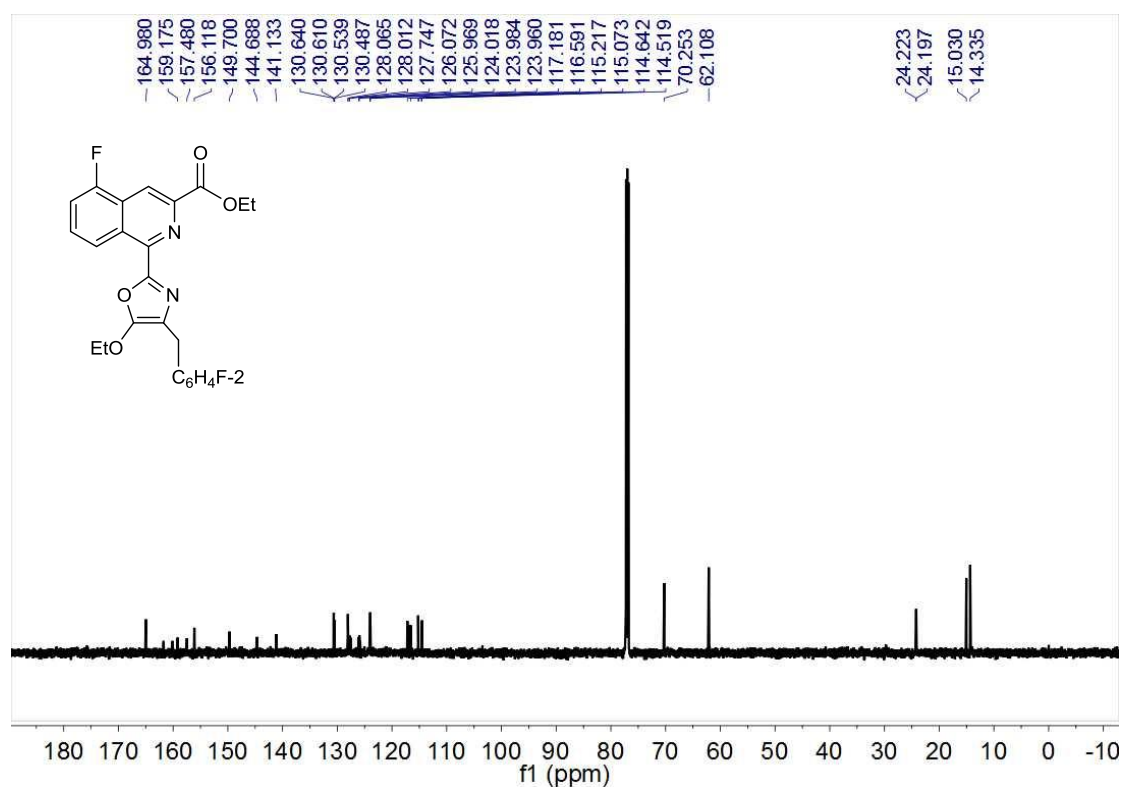

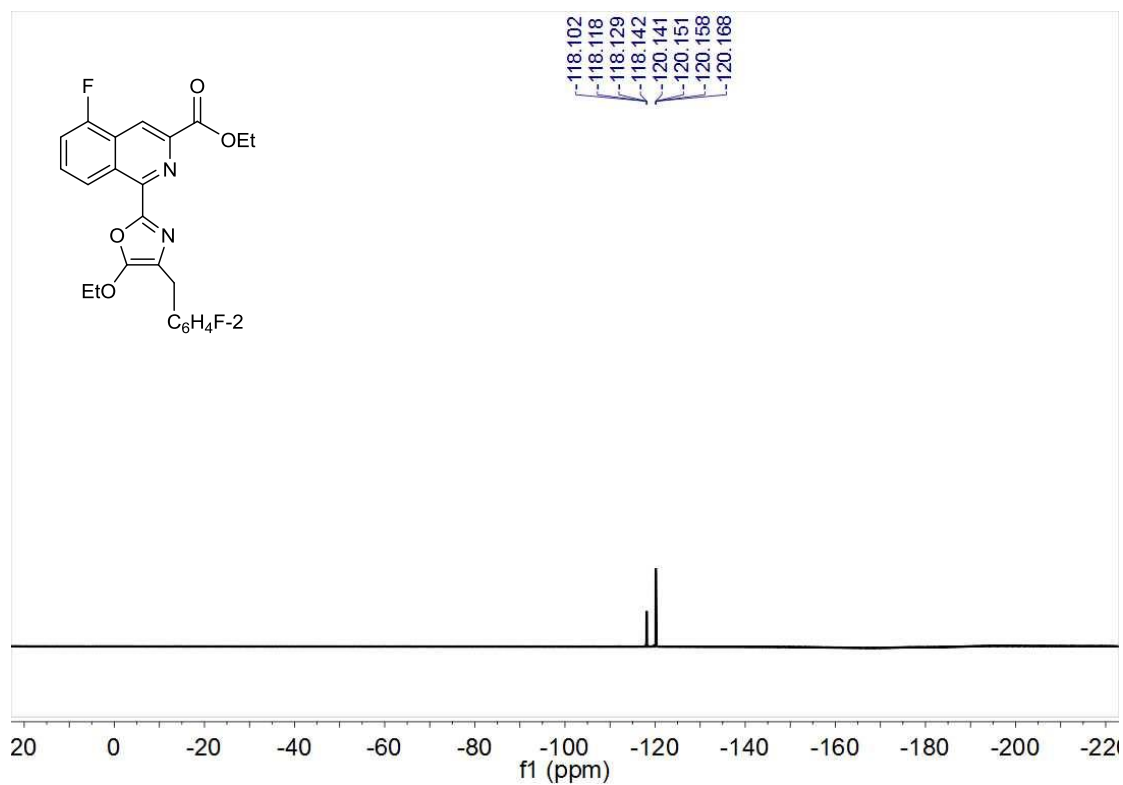

**Figure 13.** <sup>1</sup>H NMR, <sup>13</sup>C NMR and <sup>19</sup>F NMR spectra of compound 2I

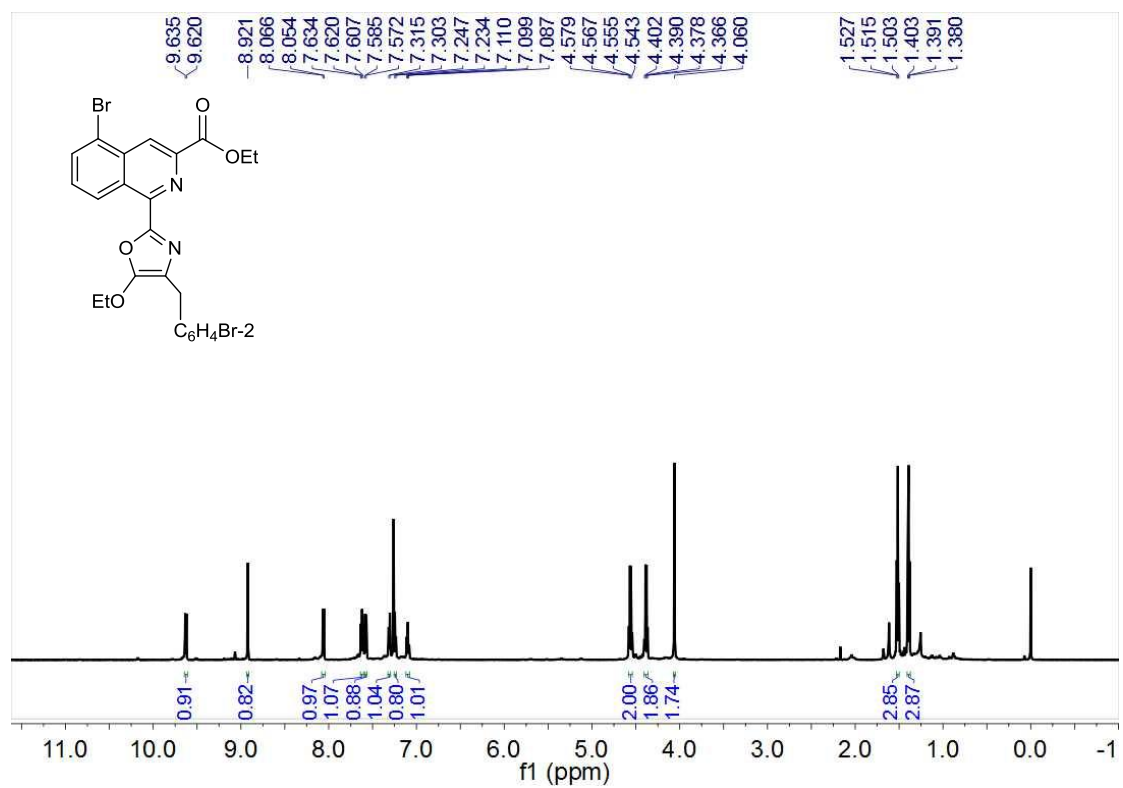



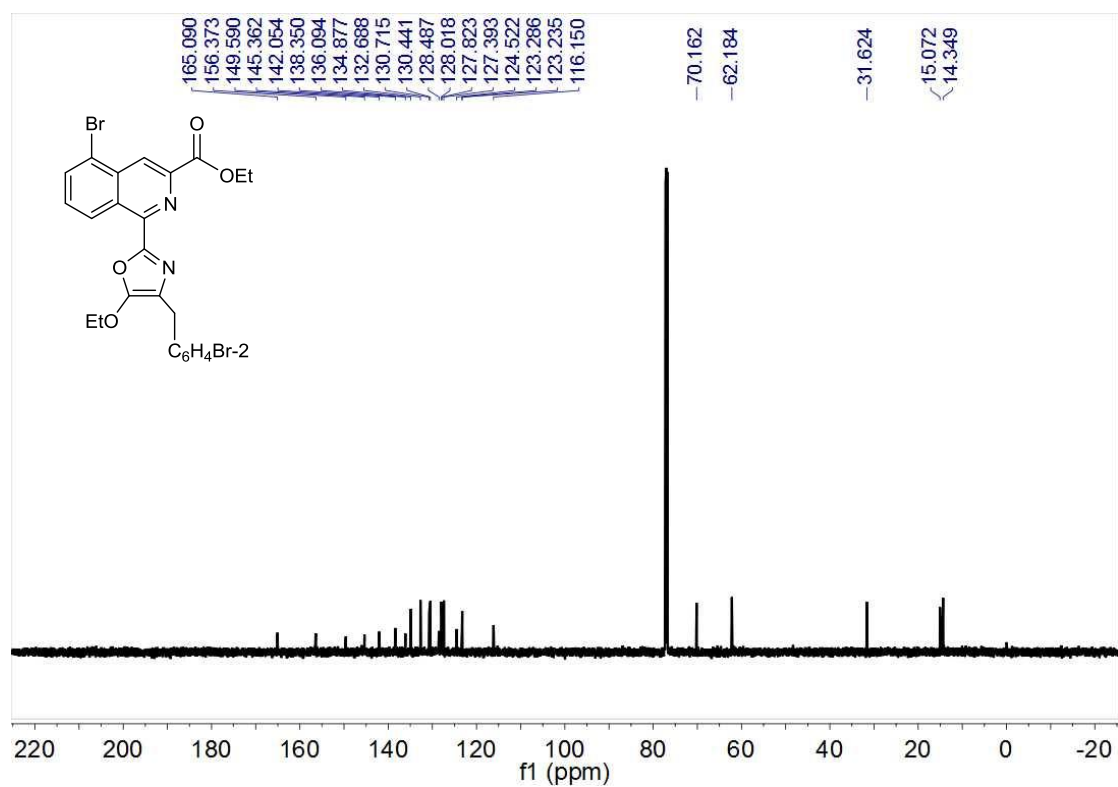

**Figure 14.** <sup>1</sup>H- (upper) and <sup>13</sup>C-NMR (lower) spectra of compound **2m**

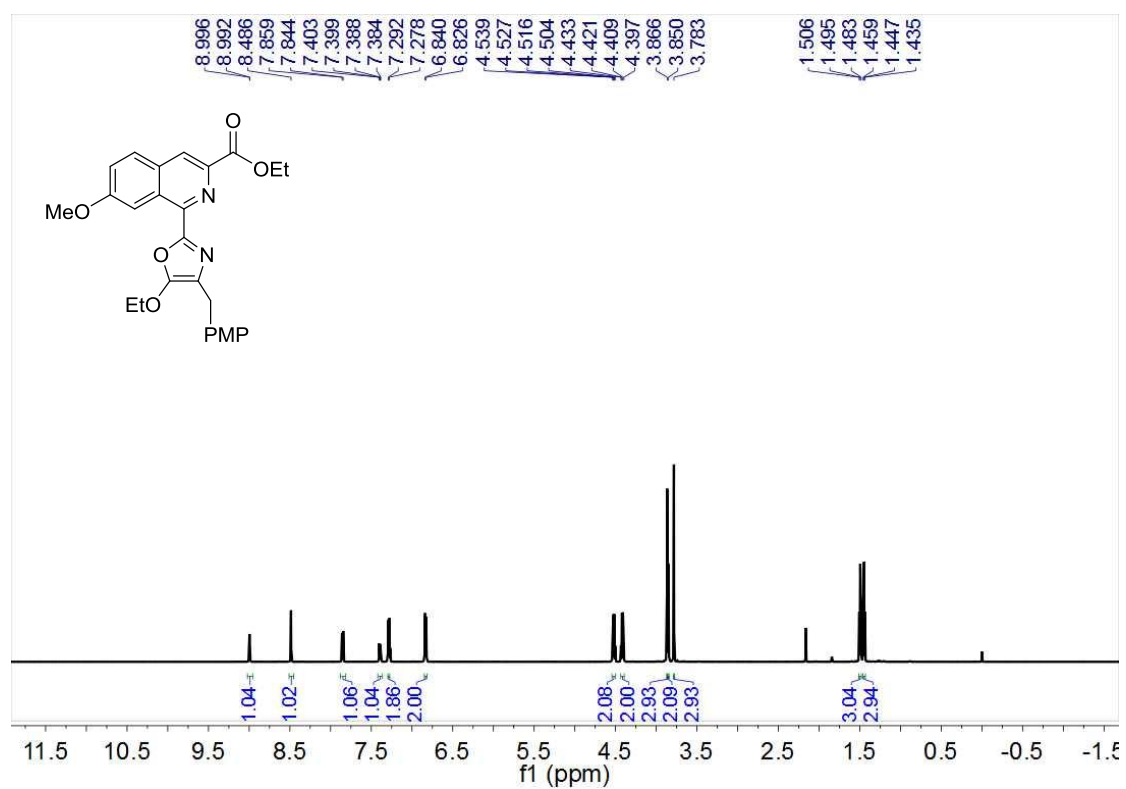

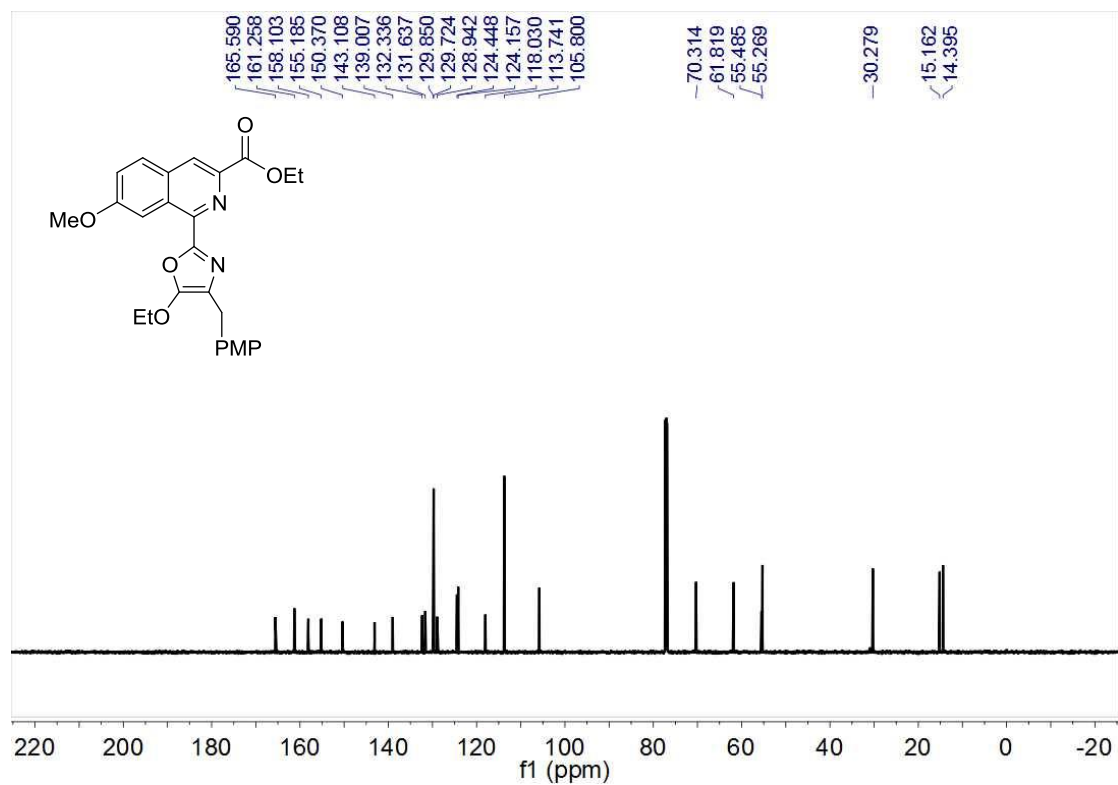

Figure 15. <sup>1</sup>H- (upper) and <sup>13</sup>C-NMR (lower) spectra of compound 2n

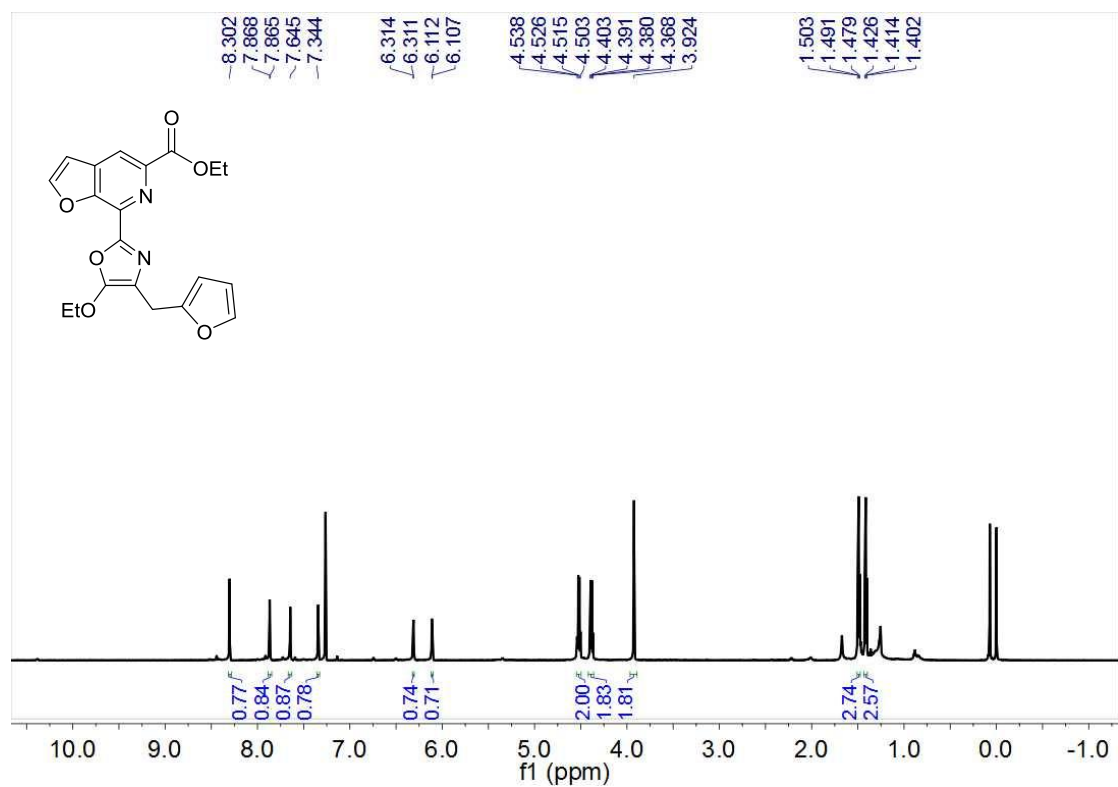

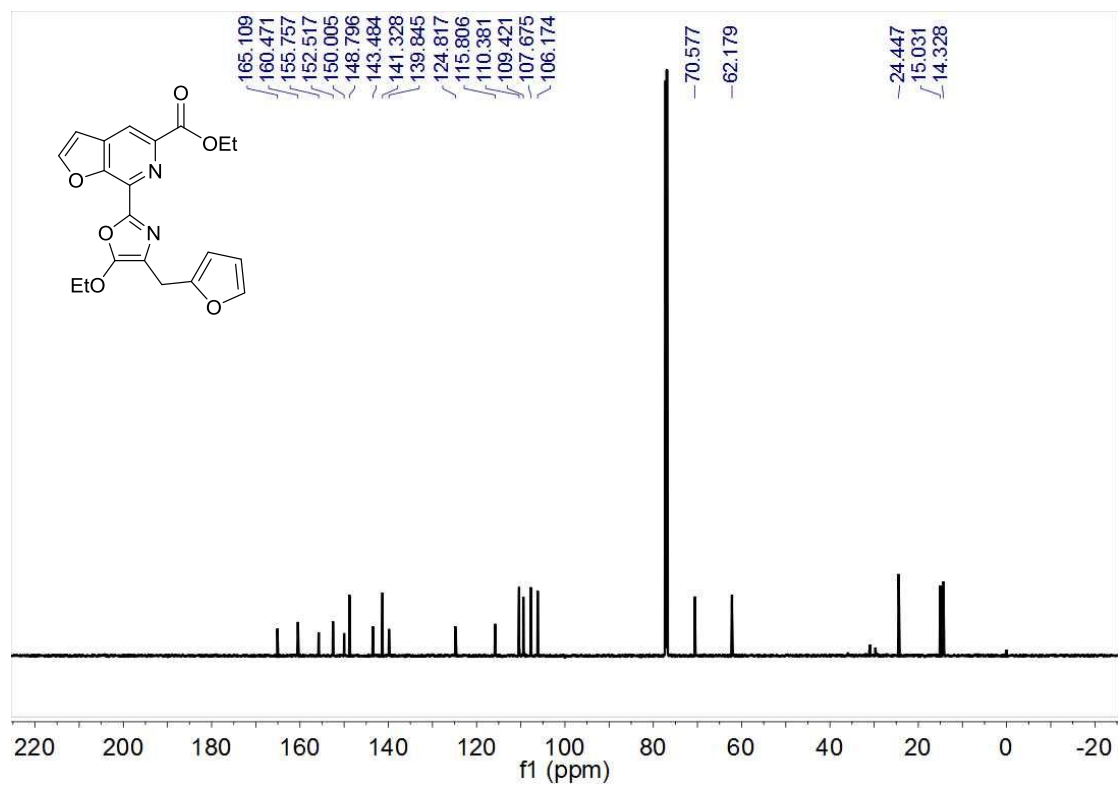

**Figure 16.** <sup>1</sup>H- (upper) and <sup>13</sup>C-NMR (lower) spectra of compound **2o**

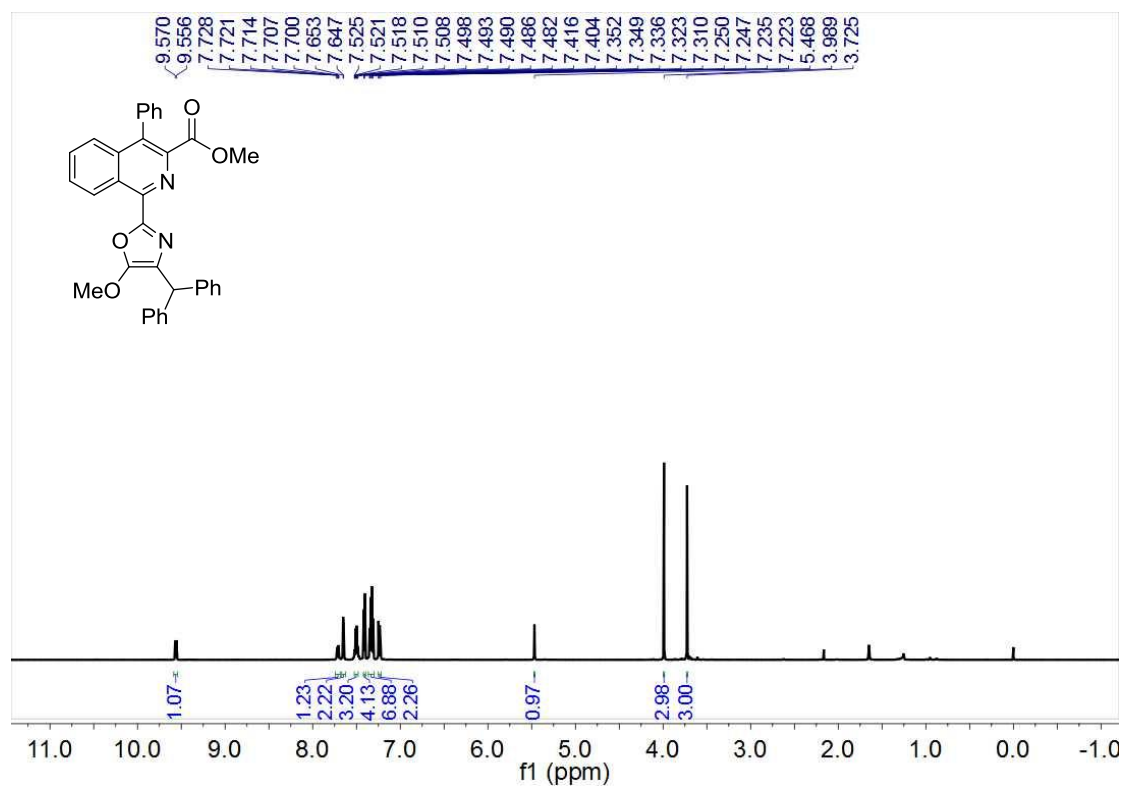

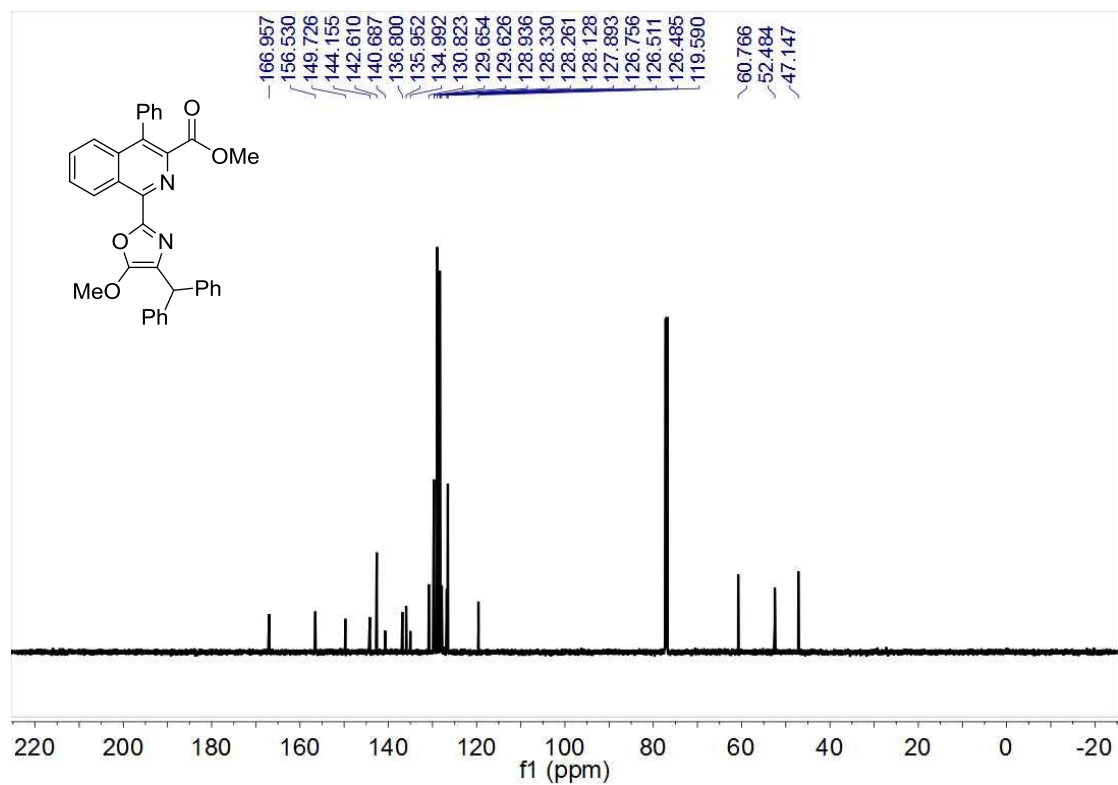

**Figure 17.** <sup>1</sup>H- (upper) and <sup>13</sup>C-NMR (lower) spectra of compound 2p

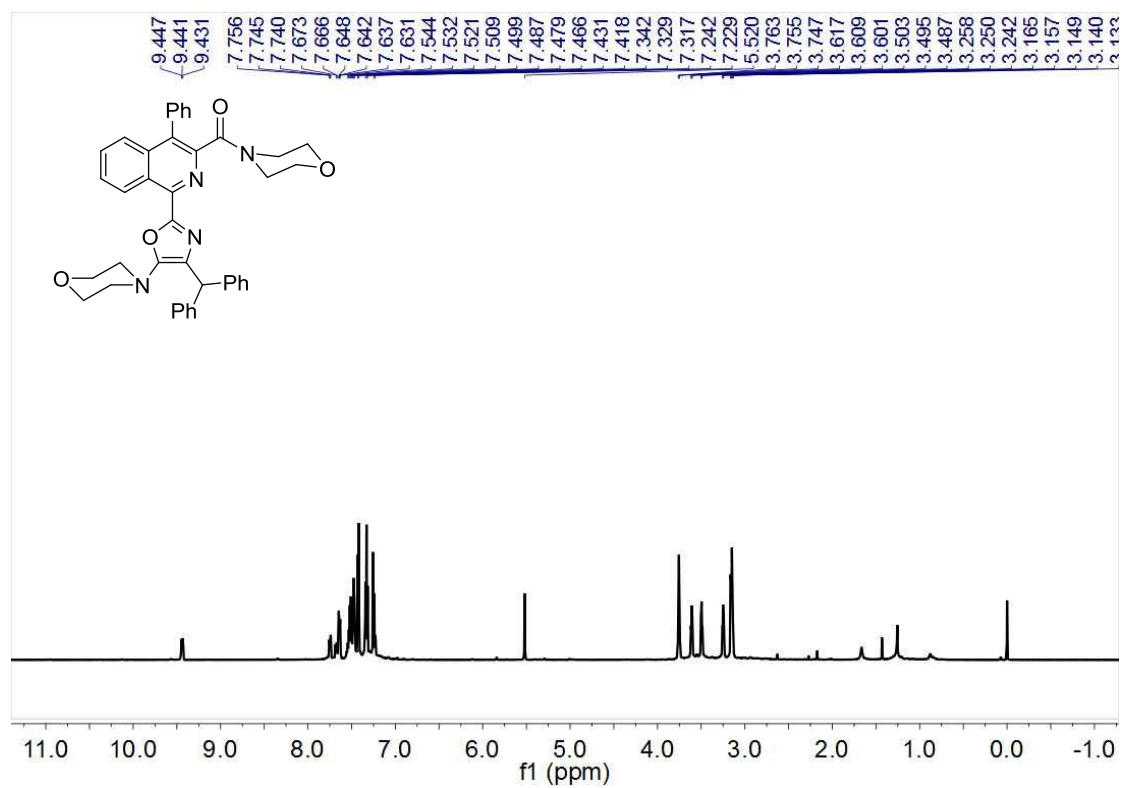

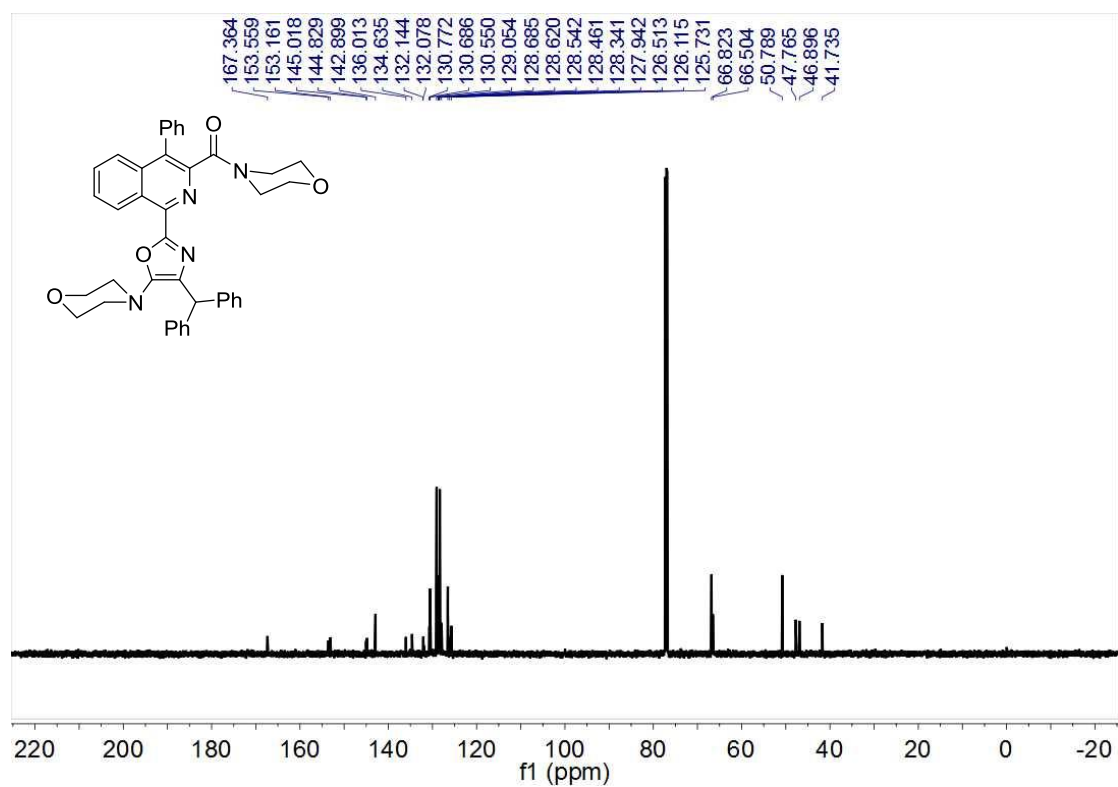

Figure 18. <sup>1</sup>H- (upper) and <sup>13</sup>C-NMR (lower) spectra of compound 2q

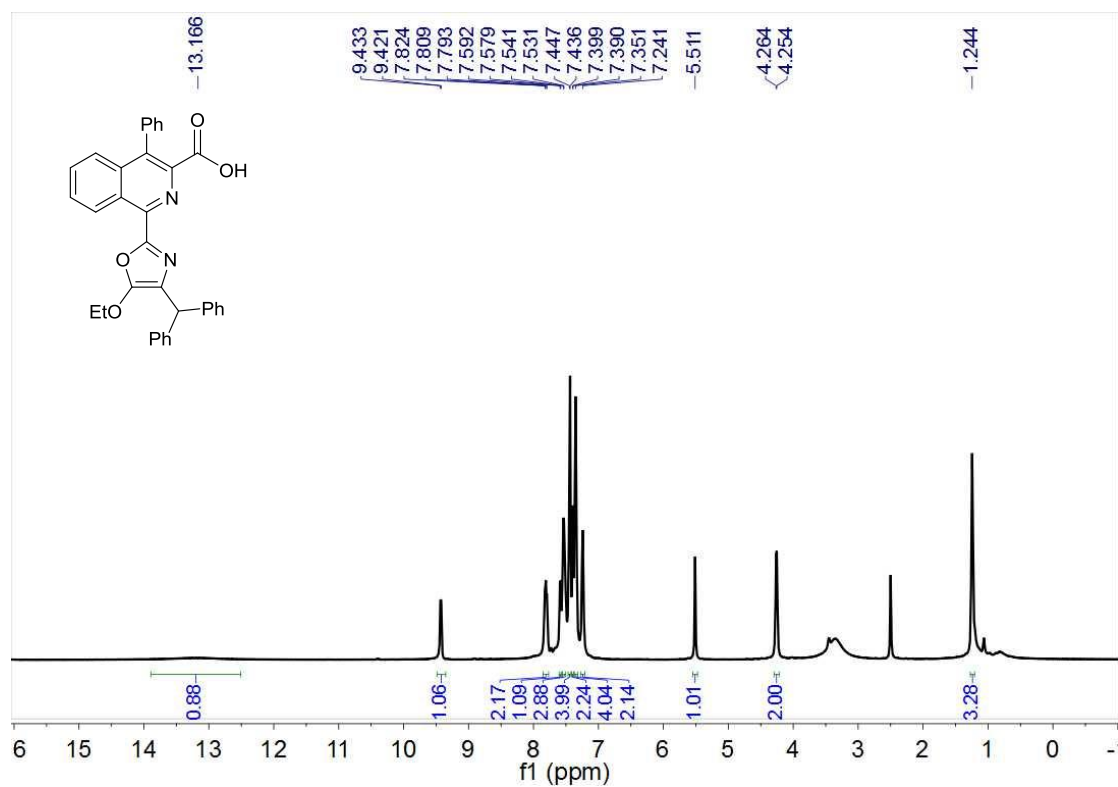

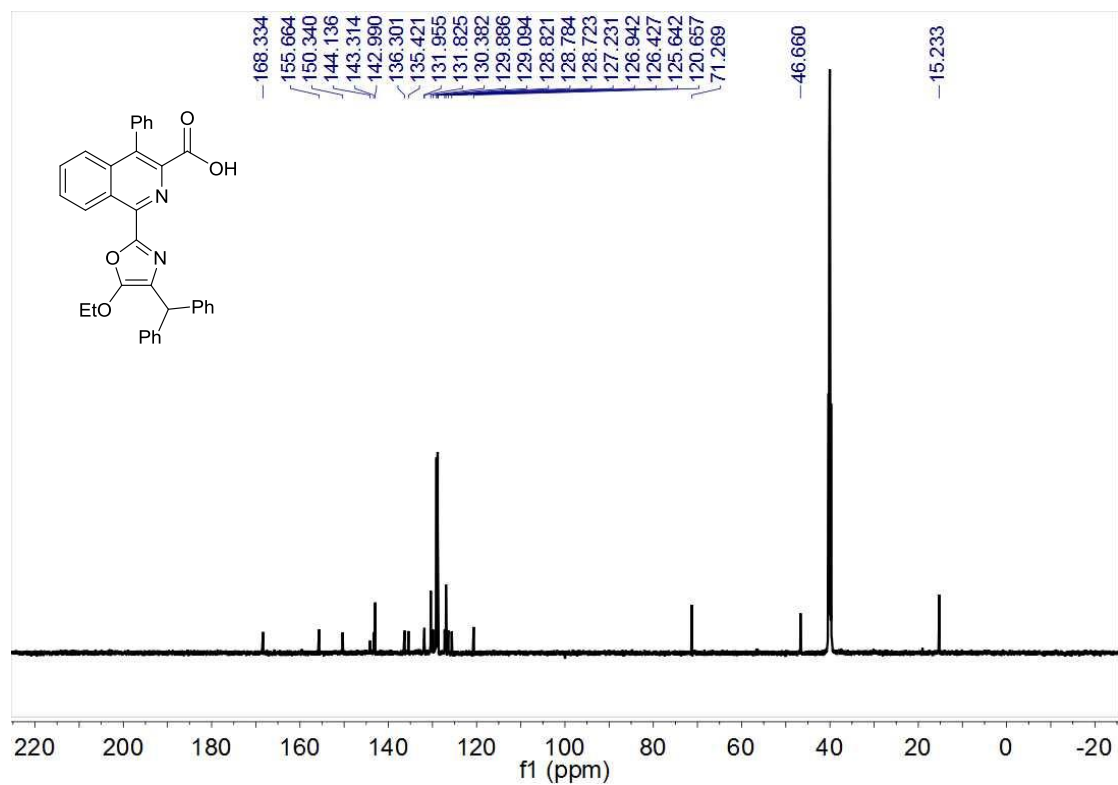

Figure 19. <sup>1</sup>H- (upper) and <sup>13</sup>C-NMR (lower) spectra of compound 3a

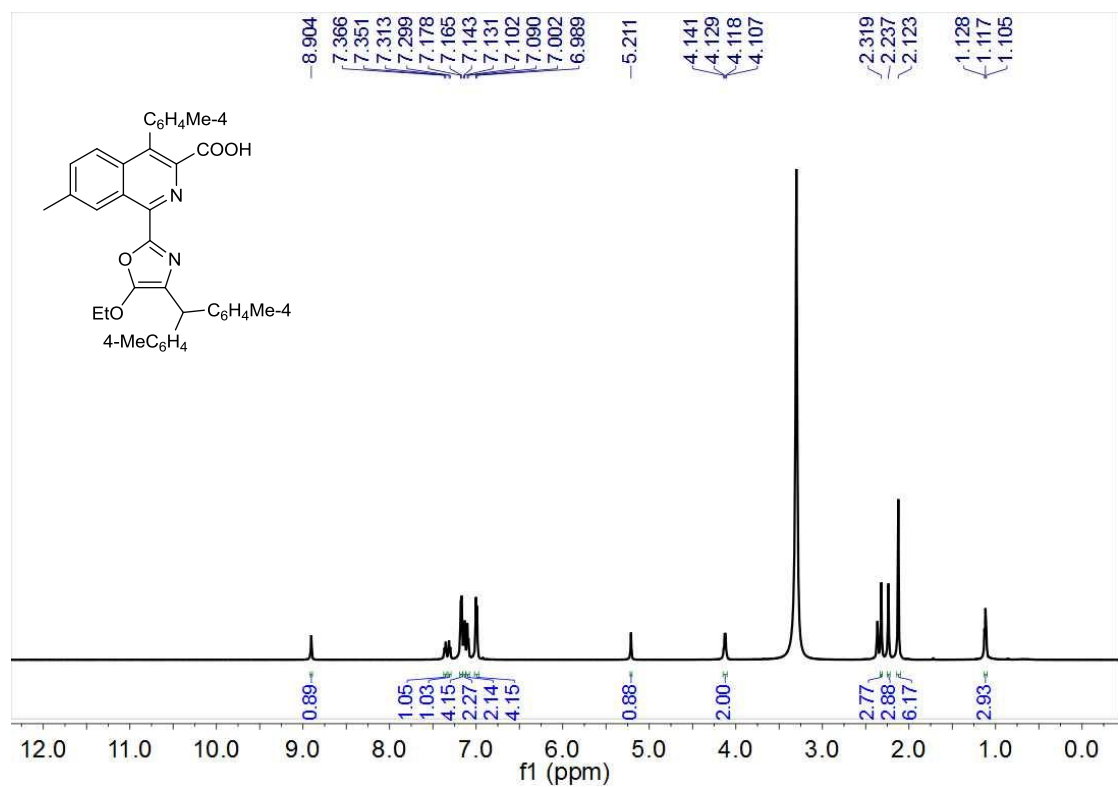

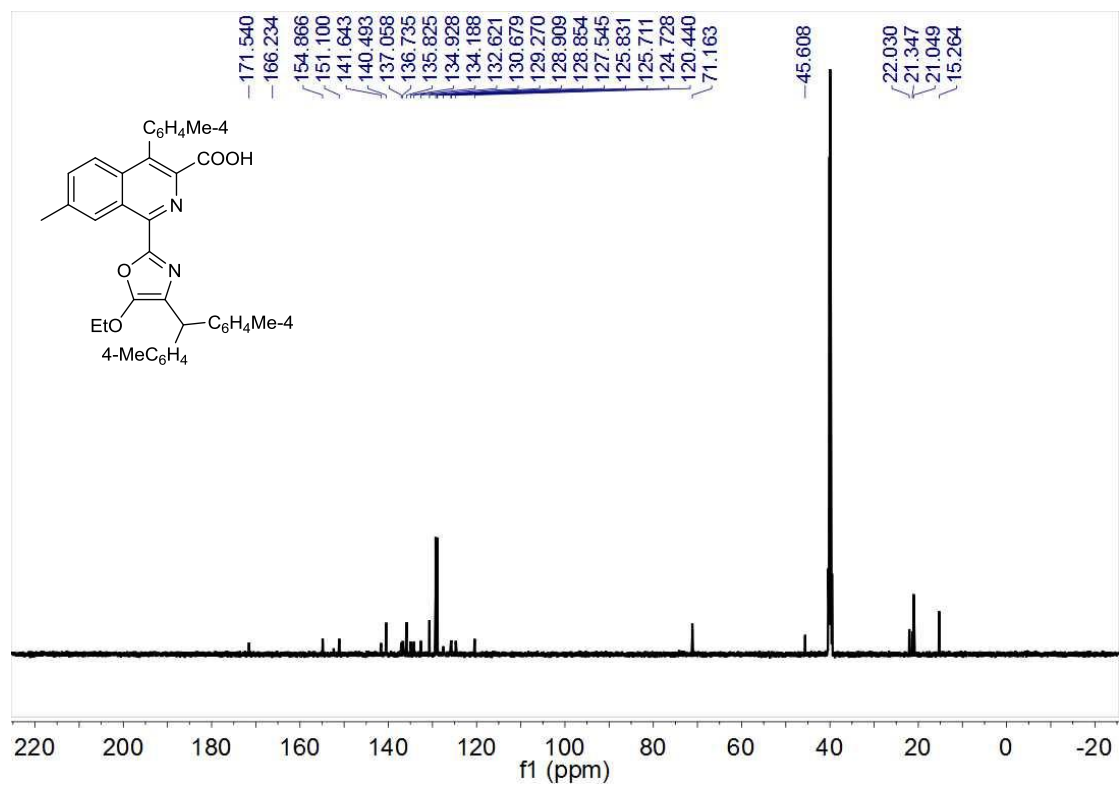

**Figure 20.**  $^1\text{H}$ - (upper) and  $^{13}\text{C}$ -NMR (lower) spectra of compound **3d**

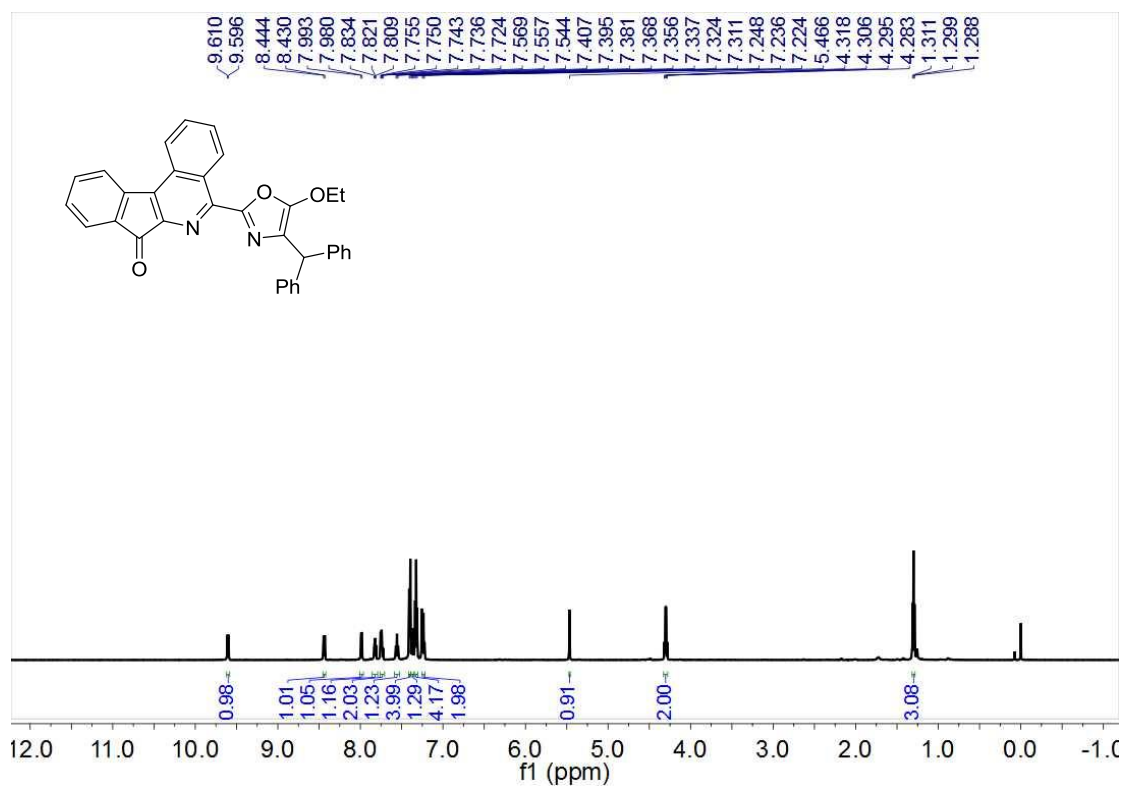

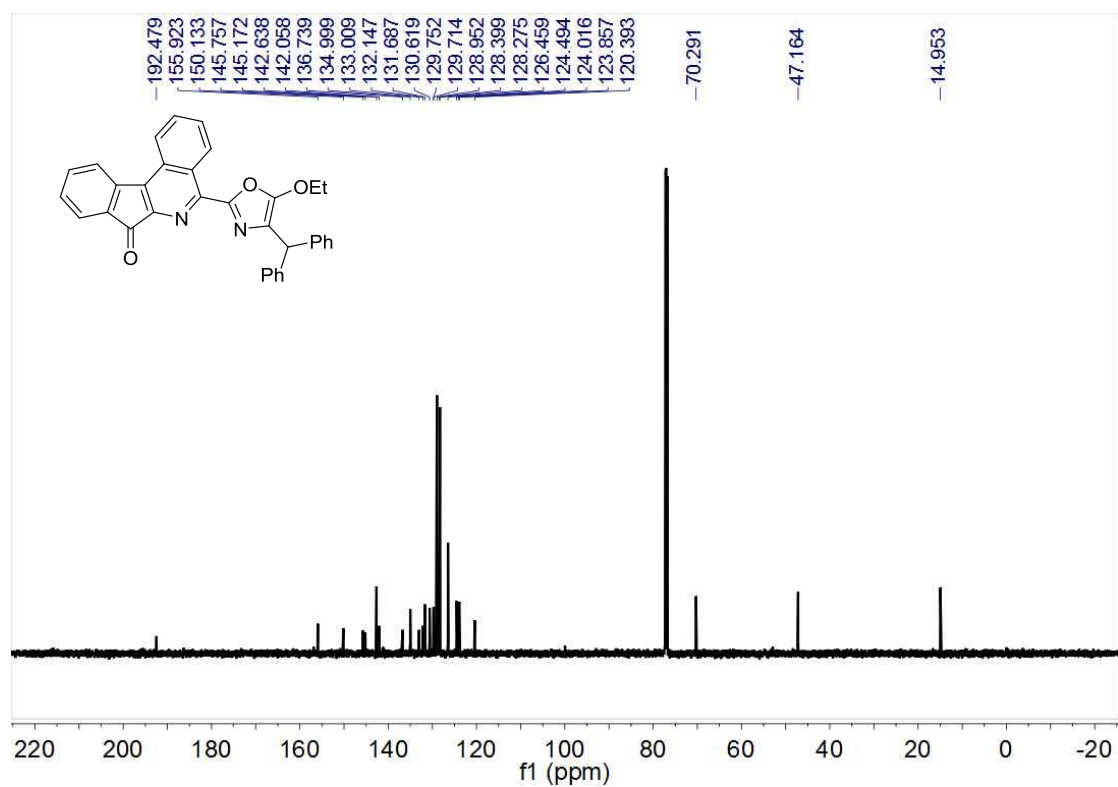

**Figure 21.** <sup>1</sup>H- (upper) and <sup>13</sup>C-NMR (lower) spectra of compound **4a**

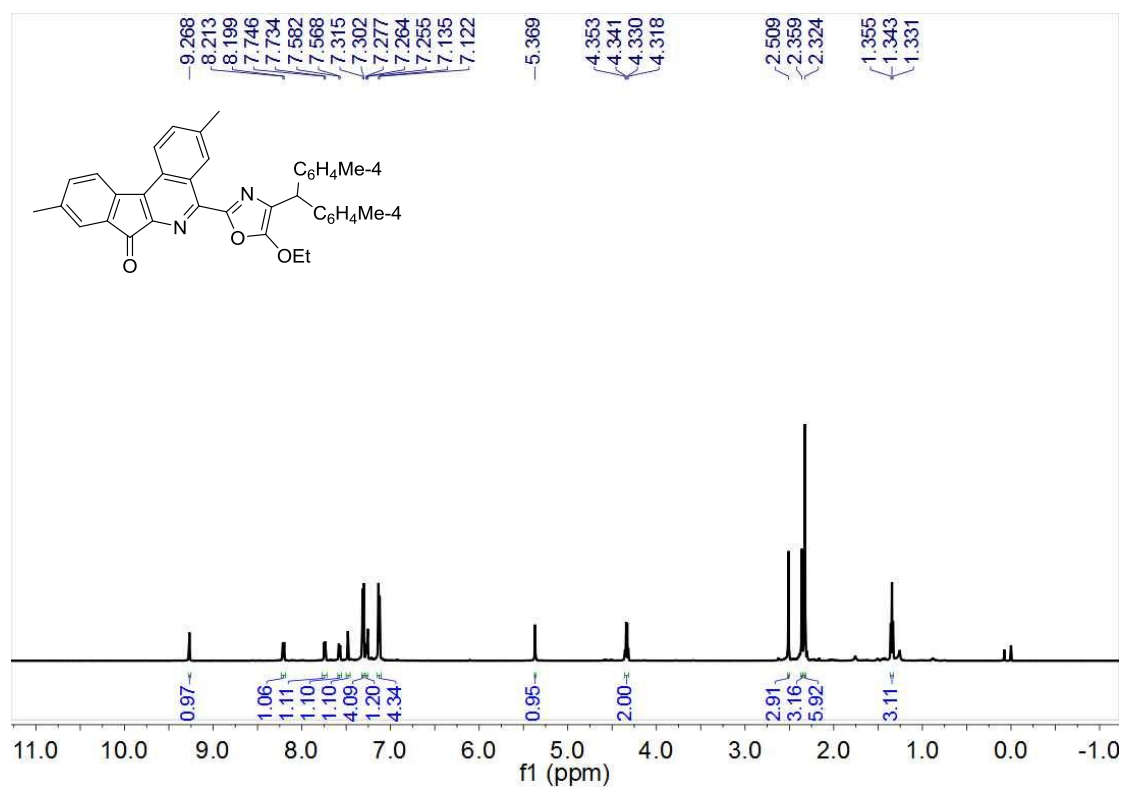



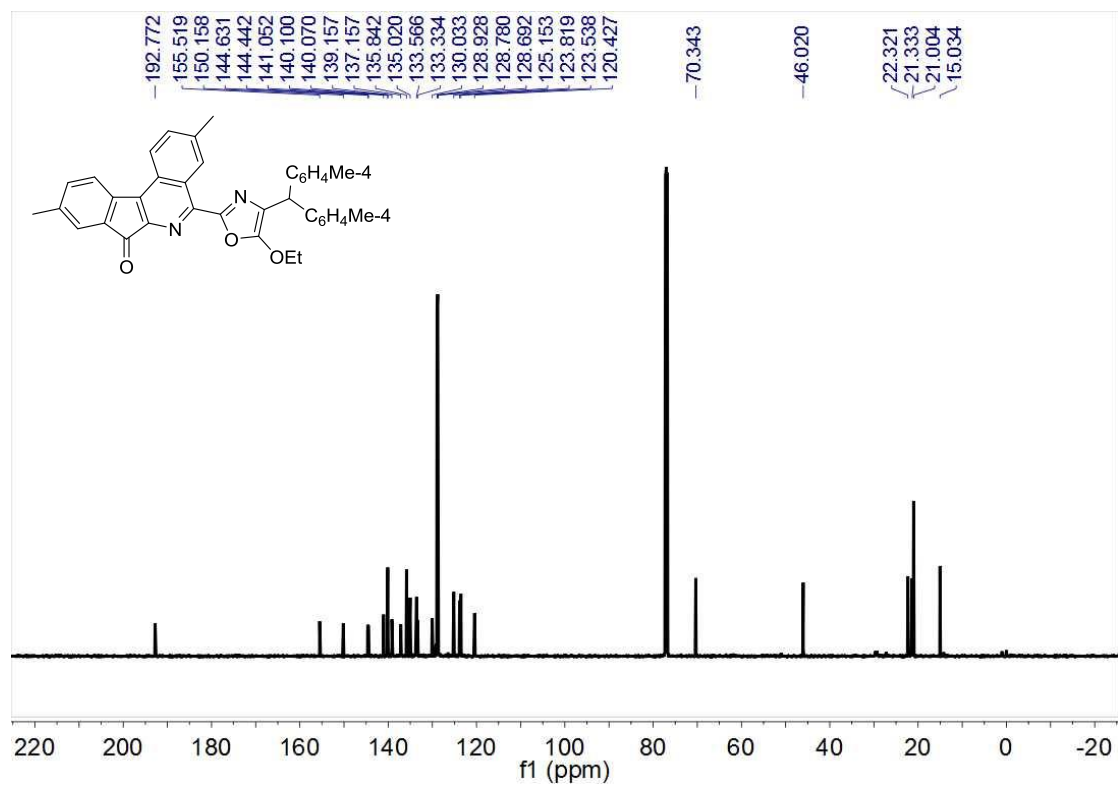

**Figure 22.** <sup>1</sup>H- (upper) and <sup>13</sup>C-NMR (lower) spectra of compound **4d**
